# Supplementary material
Source: PubMed Central journal article supplement (PMC6439599)

## Supplementary Online Content

Frey TM, Florin TA, Caruso M, Zhang N, Zhang Y, Mittiga MR. Effect of intranasal ketamine vs fentanyl on pain reduction for extremity injuries in children: the PRIME randomized clinical trial. *JAMA Pediatr*. Published online December 28, 2018. doi:10.1001/jamapediatrics.2018.4582

**eTable 1.** University of Michigan Sedation Scale

**eTable 2.** Highest Achieved UMSS Score

**eTable 3.** Vital Signs

**eTable 4.** Rescue Analgesia

**eFigure 1.** Weight-Based Dose Administration Reference

**eFigure 2.** Visual Analog Scale

This supplementary material has been provided by the authors to give readers additional information about their work.

**eTable 1.** University of Michigan Sedation Scale

| <b>The University of Michigan Sedation Scale for Children</b> |                                                                                                                  |
|---------------------------------------------------------------|------------------------------------------------------------------------------------------------------------------|
| <b>UMSS<sup>a</sup></b>                                       | <b>Clinical Features</b>                                                                                         |
| 0                                                             | Awake and alert                                                                                                  |
| 1                                                             | Minimally sedated; tired/sleepy, appropriate response to verbal conversation and/or sound                        |
| 2                                                             | Moderately sedated; somnolent/sleeping, easily aroused with light tactile stimulation or a simple verbal command |
| 3                                                             | Deeply sedated; deep sleep, arousable only with significant physical stimulation                                 |
| 4                                                             | Unarousable                                                                                                      |

<sup>a</sup> UMSS = University of Michigan Sedation Scale

**eTable 2.** Highest Achieved UMSS Score

| Highest Achieved UMSS Score |                    |              |          |        |  |
|-----------------------------|--------------------|--------------|----------|--------|--|
|                             |                    | Highest UMSS |          |        |  |
| Treatment                   | Number of Patients | 0            | 1        | 2      |  |
| Ketamine                    | 44                 | 23 (52%)     | 17 (39%) | 4 (9%) |  |
| Fentanyl                    | 42                 | 32 (76%)     | 9 (21%)  | 1 (2%) |  |

**eTable 3. Vital Signs**

| <b>Vital Signs</b>                   |                        |                        |
|--------------------------------------|------------------------|------------------------|
| <b>Measures/Time</b>                 | <b>Ketamine (n=44)</b> | <b>Fentanyl (n=42)</b> |
| HR, mean (SD), bpm                   |                        |                        |
| T0                                   | 90.8 (15.2)            | 88.6 (14.8)            |
| T15                                  | 90.1 (12.8)            | 84.4 (14.1)            |
| T30                                  | 90.5 (12.8)            | 85.6 (13.5)            |
| T60                                  | 85.1 (12.4)            | 82.9 (12.9)            |
| RR, mean (SD), breaths/min           |                        |                        |
| T0                                   | 22.1 (6.6)             | 23.0 (7.4)             |
| T15                                  | 23.1 (11.9)            | 22.3 (5.8)             |
| T30                                  | 23.3 (8.7)             | 19.9 (5.7)             |
| T60                                  | 21.8 (8.1)             | 19.7 (5.7)             |
| SBP, mean (SD), mm Hg                |                        |                        |
| T0                                   | 126.5 (19.1)           | 128.9 (19.6)           |
| T15                                  | 127.3 (18.0)           | 127.9 (19.3)           |
| T30                                  | 126.3 (15.0)           | 123.4 (15.6)           |
| T60                                  | 122.3 (14.9)           | 122.0 (15.1)           |
| DBP, mean (SD), mm Hg                |                        |                        |
| T0                                   | 78.9 (13.6)            | 73.5 (12.9)            |
| T15                                  | 76.1 (10.7)            | 73.4 (12.7)            |
| T30                                  | 76.3 (10.3)            | 73.6 (11.2)            |
| T60                                  | 70.8 (9.2)             | 70.6 (10.4)            |
| O <sup>2</sup> sat, mean (SD), %     |                        |                        |
| T0                                   | 99.8 (0.6)             | 99.6 (0.6)             |
| T15                                  | 99.6 (0.7)             | 99.2 (0.9)             |
| T30                                  | 99.5 (0.7)             | 99.4 (0.9)             |
| T60                                  | 99.3 (0.9)             | 99.3 (0.9)             |
| ETCO <sub>2</sub> , mean (SD), mm Hg |                        |                        |
| T0                                   | 36.6 (6.4)             | 38.0 (4.4)             |
| T15                                  | 36.6 (5.2)             | 38.3 (4.2)             |
| T30                                  | 38.6 (5.6)             | 40.4 (6.8)             |
| T60                                  | 38.7 (4.2)             | 38.9 (5.4)             |

**eTable 4.** Rescue Analgesia

| <b>Rescue Analgesia</b> |                        |                        |
|-------------------------|------------------------|------------------------|
| <b>Rescue Analgesic</b> | <b>Ketamine (n=44)</b> | <b>Fentanyl (n=42)</b> |
| Ibuprofen               | 1                      | 3                      |
| Fentanyl                | 1                      | 3                      |
| Morphine                | 7                      | 3                      |
| Ketamine                | 1                      | 0                      |
| Toradol                 | 1                      | 0                      |
| Total (n, %)            | 11, 25%                | 9, 21%                 |

**eFigure 1. Weight-Based Dose Administration Reference**

A Randomized Controlled Trial of Intranasal Sub-dissociative Dosing of Ketamine Compared to Intranasal Fentanyl for Treatment of Pain Associated with Acute Extremity Injuries in Children (PRIME - Pain Reduction with Intranasal Medications for Extremity injuries)

- 1) Determine corresponding volume to be administered (see table below)
- 2) MD orders PRIME study medication using Epic order set
  - “ED-PRIME, Intranasal Ketamine/Fentanyl Study for Orthopedic Evaluation”
  - Order volume to be administered that corresponds with dosing sheet in the envelope
- \*\*DO NOT ADMINISTER OR WASTE MEDICATION UNTIL CONSENT OBTAINED
- 3) RN attaches atomizer to syringe, primes the atomizer with drug solution and discards the rest of the study drug down the sink with a witness.
  - If a full 2 mL is to be administered, prime the atomizer with 0.1 mL drug solution (overflow of 0.1 mL is provided in the study drug syringe)
- 4) CRC documents syringe number and volume to be administered
- 5) RN administers medication
  - Administer intranasally via mucosal atomizer.
  - For doses greater than 0.5 mL, give 0.5 mL per nostril at a time up to 4 times. (Please DO NOT deviate from this administration protocol – this is what was approved for the study.)
- 6) RN “wastes” appropriate amount in Pyxis (see table below)
- 7) RN documents administration in EPIC on MAR

| <b>Weight (kg)</b> | <b>Fentanyl OR Ketamine</b> | <b>Volume of Waste to Document in Pyxis</b> |
|--------------------|-----------------------------|---------------------------------------------|
| 25 – 29            | 0.8 mL                      | 1.2 mL                                      |
| 29.1 – 32          | 0.9 mL                      | 1.1 mL                                      |
| 32.1 – 36          | 1 mL                        | 1 mL                                        |
| 36.1 – 39          | 1.1 mL                      | 0.9 mL                                      |
| 39.1 – 42          | 1.2 mL                      | 0.8 mL                                      |
| 42.1 – 46          | 1.3 mL                      | 0.7 mL                                      |
| 46.1 – 49          | 1.4 mL                      | 0.6 mL                                      |
| 49.1 – 52          | 1.5 mL                      | 0.5 mL                                      |
| 52.1 – 55          | 1.6 mL                      | 0.4 mL                                      |
| 55.1 – 59          | 1.7 mL                      | 0.3 mL                                      |
| 59.1 – 62          | 1.8 mL                      | 0.2 mL                                      |
| 62.1 – 65          | 1.9 mL                      | 0.1 mL                                      |
| ≥65.1              | 2 mL                        | N/A                                         |

\*\*Please circle the volume given on the table\*\*

PRIME Study ID # \_\_\_\_\_

**eFigure 2.** Visual Analog Scale

**Visual Analog Scale**

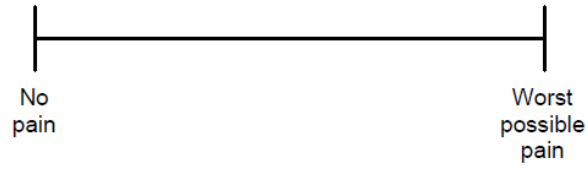

Supplement: jamapediatr-173-140-s002.pdf [file jamapediatr-173-140-s002.pdf]
