# Supplementary material
Source: PubMed Central journal article supplement (PMC6439599)
Supplement: jamapediatr-173-140-s001.pdf [file jamapediatr-173-140-s001.pdf]

1 **PROTOCOL SYNOPSIS**

2 **STUDY TITLE:**

3 Pain Reduction with Intranasal Medications for Extremity Injuries (PRIME): A Randomized Clinical  
4 Noninferiority Trial of Intranasal Ketamine vs. Fentanyl

6 **PROTOCOL TITLE**

7 Pain Reduction with Intranasal Medications for Extremity injuries (PRIME)

9 **PRINCIPAL INVESTIGATOR:**

10 Theresa M. Frey, MD  
11 Assistant Professor Clinical Pediatrics  
12 Division of Pediatric Emergency Medicine  
13 Cincinnati Children’s Hospital Medical Center  
14 513-636-7966  
15 Theresa.Frey@cchmc.org

17 **CO-INVESTIGATORS:**

18 Matthew R. Mittiga, MD  
19 Todd A. Florin, MD, MSCE  
20 Michelle C. Caruso, PharmD, BCPS  
21 Nanhua Zhang, PhD  
22 Yin Zhang, MS

24 **I. ABSTRACT**

26 **Introduction:** Inadequate pain control in the emergency department, particularly in the pediatric  
27 population, is a major health concern. The intranasal route of medication administration is gaining  
28 popularity secondary to its rapid onset of action, minimal discomfort for the patient and relative  
29 simplicity. When pediatric patients present with moderate to severe pain from traumatic injuries,  
30 opioids are currently the most frequently used class of analgesia, but they may not always be the best  
31 option for numerous reasons. Sub-dissociative dosing of ketamine has been shown to be an effective  
32 alternative to opioids in providing adequate pain relief.

34 **Objectives:** The objectives of this study are to 1) determine if intranasal ketamine is non-inferior to  
35 intranasal fentanyl in reduction of pain in children presenting with extremity injuries and 2) define and  
36 compare the level of sedation and respiratory side effect profile associated with intranasal ketamine and  
37 fentanyl.

39 **Methods:** The proposed study is a double-blind, randomized clinical non-inferiority trial of intranasal  
40 sub-dissociative ketamine compared to intranasal fentanyl for children ages 8 through 17 years of age  
41 presenting to the emergency department with moderate or severe pain due to traumatic extremity  
42 injury.

44 **Discussion:** This study will determine whether intranasal ketamine is an effective alternative to  
45 intranasal fentanyl for analgesia in children. This would be particularly useful in children who experience  
46 adverse effects with opioids, have developed opioid tolerance as a result of chronic painful conditions,  
47 have poor opioid sensitivity due to their genetic predisposition, in pediatric trauma patients with

48 hypotension or in patients requiring procedural sedation during their emergency department visit.

49

## 50 **II. PURPOSE OF STUDY**

51 The purpose of this study is to compare intranasal sub-dissociative dosing of ketamine with intranasal  
52 fentanyl for acute pain associated with traumatic limb injuries in children 8-17 years of age presenting to  
53 the emergency department.

54

### 55 **Primary Objective (or Aim)**

56 The primary objective of this study is to determine if intranasal sub-dissociative ketamine (1.5 mg/kg) is  
57 non-inferior to intranasal fentanyl (2 mcg/kg) in reduction of moderate and severe pain (VAS score  
58 greater than 35 mm [1]) associated with extremity injuries in children ages 8 years through 17 years of  
59 age.

60

61 Hypothesis #1: Intranasal sub-dissociative ketamine (1.5 mg/kg) and intranasal fentanyl (2  
62 mcg/kg) will both reduce pain by a mean VAS score of at least 15 mm. There will be no  
63 significant difference in the means for reduction in pain score between patients receiving  
64 intranasal ketamine and those receiving intranasal fentanyl.

65

### 66 **Secondary Objective (or Aim)**

67 The secondary objective is to define and compare the level of sedation associated with intranasal sub-  
68 dissociative ketamine (1.5 mg/kg) and intranasal fentanyl (2 mcg/kg) as measured by the University of  
69 Michigan Sedation Scale Score and capnometry values.

70

71 Hypothesis #2a: There will be no significant difference in mean sedation scale scores  
72 between the intranasal ketamine group and the intranasal fentanyl group.

73

74 Hypothesis #2b: There will be no significant difference in the mean capnometry values  
75 of the two groups. Patients in both groups will not experience hypopneic  
76 hypoventilation (decrease in capnometry value of  $\geq 10$  mm Hg).

77

## 78 **III. BACKGROUND**

79 A recent Institute of Medicine report illustrates that inadequate pain control is a major public  
80 health concern [2], especially in the emergency department [3]. Despite this increased awareness, pain  
81 continues to be underdiagnosed and undertreated, particularly in the pediatric population [4, 5]. In one  
82 study, less than half of 172 children presenting with acute limb fractures received an analgesic during  
83 their emergency department visit[6]. A more recent study in 2012 looking at 773 children with long  
84 bone fractures demonstrated that 10% received adequate pain medication, 31% received inadequate  
85 pain medication and 59% received no pain medication within the first hour of arriving in the emergency  
86 department [7]. In combined emergency departments where both adults and pediatric patients are  
87 treated, children are significantly less likely than adults to received pain medications [8, 9], with the  
88 youngest children being the most vulnerable population [7, 10]. Furthermore, when children do receive  
89 pain medication, they often encounter long delays in medication administration [11] possibly due to the  
90 time required to obtain intravenous access. More recently, the intranasal route has been shown to offer  
91 a more efficient alternative to allow for faster delivery of pain medication [12]. This route is gaining  
92 popularity secondary to its rapid onset of action, minimal discomfort for the patient and relative  
93 simplicity.

94 Opioids are the most commonly used class of analgesic pain medication for children presenting  
95 in severe pain due to traumatic injuries [7]. Their use during pediatric emergency department visits has  
96 increased significantly over the past decade [13]. However, multiple studies show the majority of  
97 children who present in severe pain do not receive opioids, receive doses that are below those  
98 recommended [4, 7-10, 14] or experience long delays in receiving opioids [11, 15]. The reasons for this  
99 are unclear, but we speculate that this may be due in part to fear of adverse effects of opioids, provider  
100 inexperience with opioid use in children or fear of contributing to opioid tolerance or abuse.  
101 Additionally, due to genetic variations that may affect opioid sensitivity, ideal dosing to adequately  
102 control severe pain in the majority of patients yet avoid adverse medication-related side effects is  
103 difficult to ascertain and may lead providers to seek out non-opioid alternatives for patients with acute  
104 severe pain [16-18].

105 In the adult population, low dose ketamine is well tolerated and has been used successfully as  
106 an adjuvant [19-25] and an alternative [26-30] to opioids to provide adequate, rapid pain relief in the  
107 emergency department. One study demonstrated that the majority of patients and physicians were  
108 satisfied with sub-dissociative dosing of ketamine and provided reasons why physicians opted to use  
109 ketamine, including opioid failure, concern for respiratory depression, concern for opioid allergy and  
110 concern for hypotension. In this study, 96% of emergency medicine physicians felt that low dose  
111 ketamine was underused [23]. Though most of these adult studies used the intravenous route,  
112 intranasal ketamine has also been used successfully in adults with acute pain in the emergency  
113 department, inpatient and outpatient settings [31-38].

114 As a dissociative anesthetic, ketamine is the most commonly used agent to facilitate painful  
115 procedures in the pediatric emergency department [39]. At lower doses, it has been used in children to  
116 provide analgesia in a variety of acute and chronic pain settings [40]. Low dose ketamine has been used  
117 effectively in children with terminal diagnoses [41-43], sickle cell disease [44], perioperative pain [45,  
118 46], traumatic injuries [47, 48], extensive burns [49] and conditions where opioids are contraindicated  
119 [50]. As with the adult population, ketamine has been used via the intranasal route to provide adequate  
120 analgesia and sedation in children, specifically in the pre-hospital setting and in those undergoing  
121 various procedures [51-59].

122 To our knowledge, the PICHFORK trial was the first study to demonstrate the use of intranasal  
123 sub-dissociative dose ketamine as monotherapy for acute pain in children presenting to the emergency  
124 department with traumatic injuries [60, 61]. In this study, intranasal fentanyl and ketamine were  
125 associated with similar pain reduction and satisfaction scores. These study results have yet to be  
126 replicated. If the results are reproducible, intranasal ketamine would be particularly useful in children  
127 who experience adverse effects with opioids, have developed opioid tolerance as a result of chronic  
128 painful conditions, have poor opioid sensitivity due to their genetic predisposition or in pediatric trauma  
129 patients with hypotension. Additionally, for patients that require procedural sedation for fracture  
130 reduction, avoiding opioids early in the emergency department visit may help decrease sedation  
131 recovery time [62]. During the PICHFORK trial, adverse events were documented based on patient self-  
132 report. However, there have been no studies that document side effects, vital signs, and continuous  
133 end tidal CO<sub>2</sub> levels after administration of intranasal ketamine through direct observation via video  
134 monitoring. The objective of this study is to compare intranasal sub-dissociative ketamine with  
135 intranasal fentanyl for treatment of acute pain associated with traumatic limb injuries in children  
136 presenting to the emergency department and to document an objective respiratory side effect profile  
137 utilizing noninvasive capnometry. More specifically, we will compare analgesic effect, sedation level,  
138 vital signs, continuous end tidal CO<sub>2</sub> monitoring and adverse events.

142  
143  
144  
145  
146  
147  
148  
149  
150  
151  
152  
153  
154  
155  
156  
157  
158  
159  
160  
161  
162  
163  
164  
165  
166  
167  
168  
169  
170  
171  
172  
173  
174  
175  
176  
177  
178  
179  
180  
181  
182  
183  
184  
185  
186  
187  
188

## Findings from Clinical Studies

### Clinical Studies of Sub-dissociative (Low-Dose) Dose Ketamine in Adults

#### *Intravenous (IV) Administration*

When used as monotherapy, subdissociative intravenous ketamine has been shown to provide effective analgesia and safety comparable to morphine for acute pain in the emergency department [27, 28]. Galinski, et al demonstrated that low doses of IV ketamine significantly lowered consumption of morphine by patients presenting to the emergency department with severe acute pain and resulted in minimal side effects (6 % with nausea/vomiting and 36% with neuropsychological effects, such as dizziness and dysphoria, in the ketamine group vs 6% with nausea/vomiting and 3% with neuropsychological effects in the placebo group) [25]. Ketamine combined with either morphine or hydromorphone has been shown to provide analgesia superior to that of morphine alone and resulted in only few minor side effects [19-22, 24]. In the pre-hospital setting, Tran et al found that ketamine had an analgesic effect similar to morphine and carried a lower risk of vomiting and airway problems than morphine. They also discovered that ketamine tended to improve blood pressure in hypotensive patients to a greater degree [63] (increase of 9.3 mm Hg with ketamine vs 4.8 mm Hg with morphine). In adult patients requiring procedural sedation and analgesia, Messenger et al found that patients receiving fentanyl and propofol were 5.1 times more likely to have a serious intrasedation event than patients receiving ketamine and propofol but the two groups had similar analgesic efficacy [29].

#### *Intranasal (IN) Administration*

More recently, the intranasal route has been a highly effective method of administering ketamine at sub-dissociative doses. One study revealed that intranasal ketamine was an effective analgesic agent in 56% of patients presenting to the emergency department with severe pain [32] while another demonstrated clinically significant reduction in pain scores in 88% of ED patients [31]. In both studies, IN ketamine resulted in very mild, transient side effects. Intranasal ketamine has been shown to be a safe, well-tolerated alternative to opioids for moderate to severe postoperative pain in adult patients [35, 38]. Furthermore, intranasal ketamine has provided rapid onset analgesia for breakthrough pain in adult patients with chronic pain conditions [33, 34]. One study showed that patients receiving ketamine achieved pain relief within 10 minutes of dosing which lasted up to 60 minutes and none of these patients required rescue medication to treat the pain episode [34]. **(See Appendix A for further details)**

189  
190  
191  
192  
193  
194  
195

**TABLE 1: Sub-dissociative Dose Intranasal Ketamine for Analgesia in Adults**

| Study             | N  | Ages              | Setting                         | Design                                                                                 | Doses                                                                           | Route | Outcome                                                                                                                                                                          | Adverse Effects                                                                                                                                                                                                                    |
|-------------------|----|-------------------|---------------------------------|----------------------------------------------------------------------------------------|---------------------------------------------------------------------------------|-------|----------------------------------------------------------------------------------------------------------------------------------------------------------------------------------|------------------------------------------------------------------------------------------------------------------------------------------------------------------------------------------------------------------------------------|
| Yeaman, 2014      | 72 | 26-52 years (IQR) | Emergency Department, Australia | Prospective observational study: Ketamine, second dose if no improvement in 15 min     | 0.7-1 mg/kg, second dose (if necessary) 0.5 mg/kg, median total dose 0.98 mg/kg | IN    | 56% reported VAS reduction $\geq 20$ mm at 30 minutes                                                                                                                            | Dizziness 32%<br>Euphoria 24%<br>Unpleasant taste 22%<br>Drowsiness 19%<br>Nausea 12%<br>Numbness 8%<br>Blurred vision 5%<br>Nasal congestion 4%<br>Throat irritation 3%<br>Headache 3%<br>None 21%<br>No serious AEs              |
| Andolfatto, 2013  | 40 | 36-57 years (IQR) | Emergency Department, Canada    | Prospective observational study: Ketamine                                              | 0.5-0.75 mg/kg                                                                  | IN    | 88% reported VAS reduction $\geq 13$ mm at 30 minutes                                                                                                                            | (All transient and did not require treatment)<br>Dizziness 38%<br>Unreality feeling 25%<br>Fatigue 10%<br>Nausea 8%<br>Mood change 8%<br>Hearing change 3%<br>*No headache, general discomfort or hallucination<br>*No serious AEs |
| Carr, 2004        | 20 | $\geq 18$ years   | Outpatient, USA                 | Randomized double blind crossover trial: Ketamine vs placebo                           | Ketamine 10-50 mg                                                               | IN    | Mean reduction in NPIS (10 point scale) score was 2.65 for ketamine vs 0.81 for placebo. IN ketamine is safe and effective for break through pain                                | Fatigue 45%<br>Dizziness 20%<br>Unreality feeling 20%<br>Vision changes 10%<br>Nausea 10%<br>Hearing change 5%<br>Mood change 5%<br>*No serious AEs<br>*No clinically significant change in vital signs                            |
| Christensen, 2007 | 40 | $\geq 16$ years   | Postoperative USA               | Randomized double blind single dose parallel study: Ketamine #1 vs #2 vs #3 vs placebo | Ketamine 1 10 mg<br>Ketamine 2 30 mg<br>Ketamine 3 50 mg                        | IN    | IN Ketamine at 50 mg dose demonstrated statistically significant pain relief (VAS score) compared to placebo. Largest difference in mean VAS scores relative to placebo was 46.5 | In all 4 groups:<br>Hypertension 20%<br>Poor concentration 8%<br>Throat irritation 8%<br>Tachycardia 8%<br>Emesis 5%<br>Placebo vs ketamine:<br>Placebo-headache 50%<br>Ketamine-dizzy 58%,<br>fatigue 55%, nausea                 |

|              |    |       |                                  |                                                                          |                                  |    |                                                                                                 |                                                                   |
|--------------|----|-------|----------------------------------|--------------------------------------------------------------------------|----------------------------------|----|-------------------------------------------------------------------------------------------------|-------------------------------------------------------------------|
|              |    |       |                                  |                                                                          |                                  |    | mm at 30 minutes.                                                                               | 25%, psychomimetic effects 27%<br>No serious AEs                  |
| Afridi, 2013 | 18 | 18-57 | Inpatient and Outpatient, London | Randomized double blind parallel controlled trial: Ketamine vs Midazolam | Ketamine 25 mg<br>Midazolam 2 mg | IN | Ketamine reduced migraine severity but not the duration of aura, whereas midazolam as no effect | Ketamine: Euphoria/unreality 55%<br>Midazolam: Sedation/giddy 44% |

196  
197

## 198 Clinical Studies of Sub-dissociative Dose Ketamine in Children

199

### 200 *Intravenous (IV) Administration*

201

202 Sub-dissociative intravenous dosing of ketamine has been used safely and effectively in a variety of  
203 acute and chronic pediatric conditions. One meta-analysis found that administration of ketamine was  
204 associated with decreased PACU postoperative pain intensity and analgesic requirement [45]. Two  
205 studies demonstrated that ketamine given prior to tonsillectomy resulted in significantly lower pain  
206 scores and less rescue analgesic consumption postoperatively with no difference in the incidence of  
207 vomiting or psychological sequelae [46, 64]. White et al described the use of ketamine as effective  
208 analgesia in children with toxic megacolon, a painful condition where morphine is contraindicated. None  
209 of these children reported adverse effects [50]. White et al also described the long-term (37 days),  
210 successful use of ketamine for a child with extensive burns. This patient tolerated the medication well,  
211 never developed signs of tolerance and was able to be weaned rapidly without adverse consequences  
212 [49]. Various hematologic and oncologic painful conditions that are insufficiently controlled with opioids  
213 have been effectively treated with low dose ketamine infusions. Two studies showed an opioid sparing  
214 effect of ketamine with no significant increase in adverse effects in children with cancer-related pain  
215 [41, 42], while another study described sickle cells patients with opioid-refractory pain who achieved  
216 clinically significant analgesia after the initiation of ketamine infusion [44]. Taylor et al describes the use  
217 of ketamine for end-of-life neuropathic pain in which all patients noted subjective pain relief and 79% of  
218 patients had no adverse effects [43]. Ketamine has been used effectively in the pre-hospital setting for  
219 pediatric trauma patients. None of these patients demonstrated a loss of airway, oxygen desaturation or  
220 clinically significant emergence reaction after ketamine [48]. One emergency department study  
221 demonstrated that ketamine combined with midazolam is more effective than fentanyl combined with  
222 midazolam when used for emergency pediatric orthopedic procedures and that respiratory  
223 complications occurred less frequently with ketamine than fentanyl [47].

224

### 225 *Intranasal (IN) Administration*

226

227 The intranasal route of administering ketamine to children has become more popular over the past few  
228 years. A study done in 2013 determined that 1 mg/kg intranasal ketamine provided adequate analgesia  
229 with only mild, transient side effects that did not require any treatment. None of these patients  
230 experienced dissociation or hallucination [61]. The PICHFORK trial followed in which intranasal  
231 ketamine and intranasal fentanyl were associated with similar pain reduction (82% and 79% respectively  
232 had VAS reductions > 20 mm) and satisfaction scores (83% and 72% respectively achieved satisfaction) in  
233 patients with pain from limb injuries. Again, these patients experienced no serious adverse events [60].  
234 One case series and one case report describe the effective use of intranasal ketamine in patients where  
235 intravenous access could not be established. Patients encountered few, non-serious side effects [52, 53].



236 Tsze et al illustrates the use of various doses (3, 6, or 9 mg/kg) of intranasal ketamine for procedural  
 237 sedation in pediatric laceration repair. The only adverse event documented was vomiting in 1 patient  
 238 [51]. Another study explored the use of ketamine in uncooperative pediatric dental patients. The overall  
 239 sedation success rate was 89% with ketamine only, 84% with ketamine plus midazolam and 69% with  
 240 midazolam only. There were no significant adverse effects in any of the three groups [55]. Intranasal  
 241 ketamine was also found to be a safe and effective premedication in children undergoing MRI with  
 242 nausea and vomiting as the only documented side effect [57]. Multiple studies have demonstrated the  
 243 successful use of intranasal ketamine in combination with either intranasal midazolam or sufentanil as  
 244 an analgesic or sedative for pediatric procedures [54, 56, 58, 59]. These studies demonstrated only few,  
 245 mild adverse effects with intranasal ketamine. (See Appendix B for further details)  
 246  
 247

248 **TABLE 2: Sub-dissociative and Dissociative Dose Intranasal Ketamine for Analgesia in Children**  
 249

| Study                                                                     | N  | Ages       | Setting                         | Design                                                          | Doses                                       | Route | Outcome                                                                                                                                                                                      | Adverse Effects                                                                                                                                                                                                                                                                       |
|---------------------------------------------------------------------------|----|------------|---------------------------------|-----------------------------------------------------------------|---------------------------------------------|-------|----------------------------------------------------------------------------------------------------------------------------------------------------------------------------------------------|---------------------------------------------------------------------------------------------------------------------------------------------------------------------------------------------------------------------------------------------------------------------------------------|
| Graudins, 2015<br><br>Ketamine for analgesia (sub-dissociative low dose)  | 73 | 3-13 years | Emergency Department, Australia | Double blind, randomized controlled trial: Fentanyl vs Ketamine | Fentanyl 1.5 mcg/kg<br><br>Ketamine 1 mg/kg | IN    | Median reduction in VAS score at 30 minutes for ketamine was 45 mm and for fentanyl was 40 mm (no significant difference between groups), which was maintained to 60 minutes in both groups. | <u>Fentanyl</u> :<br>Bad Taste 42%<br>Drowsiness 21%<br>Dizziness 17%<br>Itchy nose 12%<br>Nausea 4%<br>Dysphoria 4%<br>Hallucinations 0%<br><u>Ketamine</u> :<br>Bad Taste 25%<br>Drowsiness 16%<br>Dizziness 30%<br>Itchy nose 4%<br>Nausea 6%<br>Dysphoria 4%<br>Hallucinations 6% |
| Yeaman, 2013<br><br>Ketamine for analgesia (sub-dissociative low dose)    | 28 | 3-13 years | Emergency Department, Australia | Observational study: Ketamine                                   | Ketamine 0.8-1.48 mg/kg                     | IN    | IN ketamine provided adequate analgesia by 30 minutes. Median VAS decreased from 74.5 mm to 30 mm.                                                                                           | Dizziness 36%<br>Bad taste 29%<br>Dysphoria 14%<br>Nausea 11%<br>Sore throat 7%<br>Diplopia 7%<br>Amnesia 4%<br>Headache 4%<br>Vomiting 4%                                                                                                                                            |
| Johansson, 2013<br><br>Ketamine for analgesia (sub-dissociative low dose) | 9  | 7-36 years | Prehospital trauma, Sweden      | Case series: (S)-Ketamine                                       | Ketamine 0.45 mg/kg-1.25 mg/kg              | IN    | IN S-ketamine provided adequate analgesia. Median pain score decreased from 10 to 3 (on a 10 point scale).                                                                                   | Vertigo<br>Unpleasant taste                                                                                                                                                                                                                                                           |
| Tsze, 2012<br><br>Ketamine                                                | 12 | 1-7 years  | Emergency Department, USA       | Randomized, prospective double blind trial:                     | Ketamine #1 3 mg/kg<br>Ketamine #2          | IN    | Significantly higher proportion of successful                                                                                                                                                | Vomiting 8%                                                                                                                                                                                                                                                                           |

|                                                                   |     |            |                                 |                                                                                   |                                                                                              |    |                                                                                                                                                                                                                                     |                                                                                                                                                       |
|-------------------------------------------------------------------|-----|------------|---------------------------------|-----------------------------------------------------------------------------------|----------------------------------------------------------------------------------------------|----|-------------------------------------------------------------------------------------------------------------------------------------------------------------------------------------------------------------------------------------|-------------------------------------------------------------------------------------------------------------------------------------------------------|
| for sedation (dissociative dosing)                                |     |            |                                 | Ketamine (3 doses)                                                                | 6 mg/kg<br>Ketamine #3<br>9 mg/kg                                                            |    | sedations with 9 mg/kg dose than the other two doses.                                                                                                                                                                               |                                                                                                                                                       |
| Gyanesh, 2013<br><br>Ketamine for sedation (dissociative dosing)  | 150 | 1-10 years | Radiology (MRI), India          | Randomized double blind trial: Dexmedetomidine (DXM) vs Ketamine vs Normal saline | DXM 1 mcg/kg<br><br>Ketamine 5 mg/kg<br><br>Normal saline                                    | IN | DXM and ketamine were equally effective as pre-medication. In 90.4% of DXM patients and 82.7% of ketamine patients, satisfaction with conditions for IV insertion. Total dose of propofol used was less in DXM and ketamine groups. | <u>DXM:</u><br>Bradycardia 4%<br>Nausea/Emesis 4%<br><u>Ketamine:</u><br>Nausea/Emesis 10%<br><u>Saline:</u><br>Nausea/Emesis 6%                      |
| Bahetwar, 2011<br><br>Ketamine for sedation (dissociative dosing) | 45  | 2-6 years  | Outpatient Dental Clinic, India | Triple blind randomized trial: Midazolam vs Ketamine vs Midazolam + Ketamine      | Midazolam 0.3 mg/kg<br><br>Ketamine 6 mg/kg<br><br>Midazolam 0.2 mg/kg plus Ketamine 4 mg/kg | IN | Ketamine alone had the fastest onset of sedation. Sedation success rate with ketamine was 89%, midazolam was 69% and combination group was 84%.                                                                                     | No significant change in vital signs between groups.<br><br><u>Ketamine alone:</u><br>Vomiting 24%<br><br><u>Ketamine + Midazolam:</u><br>Vomiting 7% |

250

251

252

**TABLE 3. Current Unpublished Clinical Trials Involving Intranasal Ketamine**

253

| Principal Investigator        | Location | Indication | Age                     | Dosing                                 | Study Phase                | FDA application IND required |
|-------------------------------|----------|------------|-------------------------|----------------------------------------|----------------------------|------------------------------|
| Zavolkovskaya S               | USA      | Analgesia  | 3-17 years              | 1 mg/kg                                | Enrolling                  | NO                           |
| Linakis JG                    | USA      | Sedation   | 1-7 years               | Unknown                                | Completed                  | NO                           |
| Poonai N                      | Canada   | Sedation   | 5-17 years              | 5 mg/kg                                | Active, not yet recruiting | N/A                          |
| Andolfatto G                  | Canada   | Analgesia  | ≥ 6 years               | 0.5 mg/kg then 0.25 mg/kg if necessary | Completed                  | N/A                          |
| Henneberg SW<br>Schmiegelow K | Denmark  | Analgesia  | 1-19 years              | 0.5 mg/kg (plus sufentanil 0.5 mg/kg)  | Completed                  | N/A                          |
| Christophe CM                 | France   | Sedation   | Up to 2 hours (newborn) | 2 mg/kg                                | Active, not yet recruiting | N/A                          |



|          |        |          |           |         |                            |     |
|----------|--------|----------|-----------|---------|----------------------------|-----|
| Costa LR | Brazil | Sedation | 2-6 years | 4 mg/kg | Active, not yet recruiting | N/A |
|----------|--------|----------|-----------|---------|----------------------------|-----|

254 **IV. STUDY DESIGN**

255  
 256 The proposed study is a double-blind, randomized controlled non-inferiority trial of intranasal sub-  
 257 dissociative ketamine compared to intranasal fentanyl for treatment of pain associated with extremity  
 258 injuries.

259  
 260 **Intervention drug:**  
 261 Ketamine (50 mg/mL) injectable solution is a nonbarbiturate anesthetic chemically designated *d,l* 2-(0-  
 262 chlorophenyl)-2-(methylamino) cyclohexanone hydrochloride. It is formulated as a slightly acidic (pH  
 263 3.5-5.5) sterile solution for intravenous or intramuscular injection in concentrations containing the  
 264 equivalent of 50 mg ketamine base per milliliter and contains not more than 0.1 mg/mL Phemerol®  
 265 (benzethonium chloride) added as a preservative.

266  
 267 **Comparator drug:**  
 268 Fentanyl Citrate Injection, USP, CII (50 mcg/mL) is a sterile, nonpyrogenic solution of fentanyl citrate in  
 269 water for injection. Fentanyl Citrate is a potent opioid agonist. Each milliliter contains fentanyl (as the  
 270 citrate) 50 mcg (0.05 mg). It may contain sodium hydroxide and/or hydrochloric acid for pH adjustment.  
 271 pH 4.7 (4.0 to 7.5). The solution contains no bacteriostat, antimicrobial agent or added buffer and is  
 272 intended only for use as a single-dose injection.

273  
 274 For analgesic dose volumes equal to and less than 0.5 mL, the entire dose will be administered via  
 275 mucosal atomizer in 1 of the nares. Doses greater than 0.5 mL will be divided equally to both nares.  
 276 Medication will be given via the LMA MAD Nasal™ which enables a seal to be formed with the nostril  
 277 and atomized particles of medication to be delivered to the nasal mucosa.

278  
 279 Should the guardian provide consent, the subject will be randomized to receive either the study  
 280 medication of intranasal ketamine (1.5 mg/kg) or the comparator of intranasal fentanyl (2 mcg/kg).  
 281 Patients of guardians who decline will receive standard Cincinnati Children’s Hospital ED therapy for  
 282 pain associated with extremity injuries. Enrolled subjects will be followed for a minimum of 120 minutes  
 283 after receiving the study medication in the emergency department. Study data forms, electronic medical  
 284 records, and continuous video monitoring of patients during the first 15 minutes will provide visual  
 285 analog scale (VAS) pain scores, University of Michigan Sedation Scale scores, capnometry values, vital  
 286 signs and detection of other adverse events. Study data beyond 15 minutes will be obtained from study  
 287 data forms and electronic medical records.

288  
 289 **Randomization and Blinding**

290  
 291 Randomization will be allocated through permuted block randomization with randomly varied blocks of  
 292 6 and 8 using a 1:1 ratio within blocks. The randomization scheme will be generated by a computer  
 293 random number generator. Subjects will be randomized to receive either intranasal ketamine (1.5  
 294 mg/kg) or intranasal fentanyl (2 mcg/kg) upon meeting inclusion criteria. Allocation will be concealed  
 295 using pre-numbered syringes of study medication. The color and odor of the two medications in the  
 296 syringes will be identical. The volumes will be slightly different due to the concentrations of the  
 297 medications, but the syringes will be stored in a way that will not allow for comparison between the  
 298 syringes. The syringes will be stored with sealed envelopes that contain instruction of how much

299 volume of medication to administer. The instructions will not contain the name of the medication in the  
300 accompanying syringe. Investigational drug services (IDS) will prepare the study medication in a sterile  
301 fashion and place the pre-numbered syringes in the pyxis. Therefore, medications will be prepared prior  
302 to patient arrival in the emergency department and IDS members will not engage in patient care. The  
303 nurses will obtain a pre-numbered syringe from the pyxis and administer the medication based on  
304 weight categories. Due to the nearly identical appearance of the syringes and the use of sealed  
305 envelopes with administration instructions, the nurses, physicians, PCAs, medics, staff, patient and  
306 family members will all be blinded to whether the subject is receiving ketamine or fentanyl.

307  
308 The randomization list will be located in the office of investigational drug services. Should the need arise  
309 to unblind an investigator due to a subject experiencing a serious adverse event (SAE) or other serious  
310 circumstance, the investigator will contact investigational drug services for the particular subject in  
311 question. If there is a perceived immediate need for unblinding, the pharmacy may be contacted  
312 regarding which drug was given. A report detailing the need to unblind will be generated by the treating  
313 physician and forwarded to the IRB through the investigator. If unblinding occurs more than 60 minutes  
314 after the study medication is administered, this will not be considered a protocol violation.

315

## 316 **V. DURATION**

317

318 All study measures will occur during the emergency department visit, with the exception of the thirty  
319 day post treatment phone follow up call. The emergency department phase duration will last 120  
320 minutes after study medication is administered while the patient remains in the emergency department.  
321 All pain scores, sedation scores, capnometry values, vital signs, adverse events, and rescue analgesia will  
322 be documented within the first 120 minutes of the visit.

323 Participants will receive a phone call 30 days after drug treatment to follow up on any adverse events  
324 that occur beyond 120 minutes after initial medication administration.

325

326 The anticipated duration of the enrollment phase of this study is nine months. Data analysis will occur  
327 over the following two months.

328

## 329 **VI. SELECTION AND RECRUITMENT OF PARTICIPANTS**

330

### 331 **Inclusion Criteria:**

332

- 333 1) Age 8 years to 17 years (up to the 18<sup>th</sup> birthday)
- 334 2) Presenting to emergency department with an extremity injury and triaged as an orthopedic  
335 evaluation. Extremity injuries may be single or multiple
- 336 3) VAS pain score 35 mm or greater
- 337 4) Patient with parent or legal guardian
- 338 5) Parent or legal guardian is willing to provide consent

339

### 340 **Exclusion Criteria:**

341

- 342 1) Received narcotic pain medication prior to arrival
- 343 2) Evidence of significant head, chest, abdominal, or spine injury
- 344 3) GCS < 15 or unable to self report pain score
- 345 4) Nasal trauma or aberrant nasal/airway anatomy per parent report

- 346 5) Active epistaxis
- 347 6) Allergy to ketamine, fentanyl or meperidine (Fentanyl and meperidine are both in the same class
- 348 of medications—phenylpiperidines. An allergy to meperidine is an absolute contraindication to
- 349 fentanyl use)
- 350 7) Non-English speaking parent and/or child
- 351 8) History of psychosis
- 352 9) Postmenarchal females without a urine or serum assay documenting the absence of pregnancy
- 353 10) Patient brought in by 20/20 juvenile detention in Cincinnati or in police custody (considered a
- 354 vulnerable population)
- 355 11) Pregnancy

356  
357 Subjects that do not meet all of the enrollment criteria may not be enrolled. If there is a question of  
358 whether a patient qualifies for enrollment, the principal investigators may be contacted. Any violations  
359 of these criteria must be reported in accordance with IRB Policies and Procedures.

360  
361 Potential subjects will be identified during triage via the established orthopedic evaluation protocol as  
362 defined by a patient that has a “suspected acute deformity AND is experiencing pain and/or decreased  
363 pulses or sensation in the injured extremity.” When a patient meets the orthopedic evaluation criteria,  
364 a page will go out to ED staff as is standard procedure. The patient will be brought to the designated  
365 location as directed by the orthopedic evaluation process. A member of the research study team trained  
366 in enrollment procedures for this trial will respond to the designated location. The study staff will  
367 screen potentially eligible subjects using the protocol inclusion and exclusion criteria. A urine or serum  
368 assay will be obtained on all postmenarchal females, if their pain level allows, to document negative  
369 pregnancy status. If a urine or serum assay cannot be obtained secondary to pain level, the subject will  
370 be excluded from the study as per the exclusion criteria.

### 371 **Sample Size and Power Analysis**

372  
373  
374 The sample size calculation is based on a non-inferiority test of the difference between two means.  
375 Group sample sizes of 39 and 39 achieve 80% power to detect non-inferiority using a one-sided, two-  
376 sample t-test. The margin of non-inferiority is 10. Literature has shown that the minimum clinically  
377 significant difference in VAS pain score in children is 10-12 [65, 66] which is why 10 was chosen as our  
378 non-inferiority margin. The true difference between the means is assumed to be 5 based on the  
379 PICHFORK trial, which found a median rating reduction of 40 mm (IQR 20 to 45) at 30 minutes for  
380 fentanyl and a median rating reduction of 45 mm (IQR 20-60) at 30 minutes for ketamine, and therefore,  
381 a difference in medians of 5 (-10 to 20, 95% CI) [60]. Using the IQR information from the PICHFORK trial  
382 and assuming normality for the pain scores, we estimate the standard deviations to be 29.63 and 22.22  
383 for the rating reduction at 30 minutes for the fentanyl and ketamine groups, respectively. Therefore,  
384 with an  $\alpha$  of 0.05 and a  $\beta$  of 0.2 (80% power), the sample size required to detect this difference was  
385 estimated to be 39 subjects in each group, for a total of 78 subjects. In order to achieve this number of  
386 evaluable subjects, we plan to enroll 90 subjects, anticipating that not all subjects enrolled will be fully  
387 evaluable. Over the last year, there were 634 patients who presented to the CCHMC ED and were  
388 triaged as orthopedic evaluations. Of these, 360 were in the age group specified in the inclusion criteria.  
389 Given this data, we expect to be able to successfully complete this study as planned.

390  
391  
392

393  
394  
395  
396  
397

**VII. STUDY PROCEDURES**

**Table 4. Study Procedures**

| Visits                                                  | Visit 1         |            |             |             |             |               | Visit 2         |
|---------------------------------------------------------|-----------------|------------|-------------|-------------|-------------|---------------|-----------------|
|                                                         | Screening Phase | Enrollment | 15 (±5) min | 30 (±5) min | 60 (±5) min | 120 (+30) min | +30 (±5) days * |
| Informed Consent, Assent for subjects ages 12-17        |                 | X          |             |             |             |               |                 |
| Review Inclusion/Exclusion Criteria                     | X               |            |             |             |             |               |                 |
| Demographics/Medical History                            | X               |            |             |             |             |               |                 |
| Physical Examination                                    | X               |            |             |             |             |               |                 |
| Vital signs (HR, RR, BP, O2 sat)                        |                 | X          | X           | X           | X           | X             |                 |
| Serum or urine pregnancy test for postmenarchal females | X               |            |             |             |             |               |                 |
| Weight                                                  | X               |            |             |             |             |               |                 |
| VAS pain score                                          |                 | X          | X           | X           | X           |               |                 |
| UMSS sedation score                                     |                 | X          | X           | X           | X           |               |                 |
| Nasal mucosal exam                                      | X               |            |             |             |             | X             |                 |
| Smell test                                              | X               |            |             |             |             | X             |                 |
| Capnometry value                                        |                 | X          | X           | X           | X           |               |                 |
| Randomization                                           |                 | X          |             |             |             |               |                 |
| Dispense study drug                                     |                 | X          |             |             |             |               |                 |
| Adverse event/Serious adverse event assessment          |                 | X          | X           | X           | X           | X             | X               |

398

\*Visit 2 window +/- 5 days.

399

**(See Appendix C for study flow diagram, Appendix D for current orthopedic evaluation flow diagram, and Appendix E for duration of study procedures)**

400

401

402

**SCREENING**

403

404

405

Potential subjects will be identified during triage via the established orthopedic evaluation protocol as defined by a patient that has a suspected acute deformity AND is experiencing pain and/or decreased pulses or sensation in the injured extremity. The patient will be brought to the shock trauma suite (STS) or designated area as directed via the orthopedic evaluation process where potential subjects will be rapidly screened using the protocol inclusion and exclusion criteria. An emergency medicine attending

406

407

408

409

410 physician and/or fellow, resident, nurse, PCA, medic, and child life provider will respond to the STS or  
411 designated area as per established protocol. Study staff trained in enrollment procedures for this trial  
412 will also respond to the STS or designated area. The nurse will obtain patient's pain score as per the  
413 standard of care. Physical exam, vital signs, weight and demographics will be collected as part of  
414 standard of care prior to consent.

415

## 416 **VISIT 1**

417

### 418 **Process of Obtaining Informed Consent**

419

420 Study staff will carry a pager and present to all orthopedic evaluations that are paged out to the ED staff.  
421 All patients who are triaged as an orthopedic evaluation will be screened for eligibility. Prior to  
422 approaching potential subjects, the eligibility criteria will be reviewed with the attending and/or fellow.  
423 Parents/guardians of subjects who meet eligibility criteria will be approached by trained study staff.

424

425 The study staff will briefly introduce the study and gauge the parent/guardian's interest. Study staff will  
426 initiate the consent process and review the consent document with parents/guardians who express  
427 interest. Parents/guardians will be given time to review the consent document independently and ask  
428 the study staff questions.

429

430 After the consent has been thoroughly reviewed and the parent/guardian has had all of their questions  
431 answered, the study staff will ask the parent/guardian if they would like for their child to participate in  
432 the research study. If the parent/guardian agrees to have their child participate in the study, then the  
433 study staff will obtain their signature on the consent document and initiate the start of study  
434 procedures. Parents/guardians will receive a copy of the signed consent form. Data collected as part of  
435 the routine standard of care interventions will be used as baseline study data.

436

437 We are requesting a waiver of assent for young children (defined as patients less than 12 years of age).  
438 Since we are enrolling patients with moderate to high pain scores, young patients may be limited in their  
439 capacity to provide assent prior to pain treatment. We will use parental permission in lieu of assent for  
440 these patients. However, patients 12-17 years of age will be required to assent to the study. The  
441 investigators will engage children 12-17 years in a thorough discussion of the study consent and seek  
442 their input/decision on participation. Their decision to participate will be documented in the informed  
443 consent process note. It is felt that the child is most served by maximizing focus on the actual discussion  
444 with the child; documentation of this assent is in the informed consent process note. Study staff will  
445 obtain and document assent prior to the initiation of study procedures.

446

### 447 **Emergency Department Phase**

448

449 After informed consent is obtained, the subject will be randomized to receive either intranasal ketamine  
450 (1.5 mg/kg) or intranasal fentanyl (2 mcg/kg). All data will be recorded on a standardized REDCap  
451 electronic case report form. Investigational drug services will independently prepare the study  
452 medications in pre-numbered sequential syringes. The volume, color and odor of the two medications  
453 in the syringes will be identical. Thus, the ED treatment team, patient and patient's family, and the  
454 research team will be blinded to which medication the patient will receive. The patient's physician will  
455 order plain radiographs as per standard of care, and the study drug through an EPIC order set. The study  
456 staff and nurse will ensure a full set of vital signs (including capnometry value) and urine or serum

457 pregnancy test for all post menarchal female patients. A nasal mucosal exam and smell test will be  
458 performed prior to drug treatment and at 120 minutes post treatment. Continuous pulse oximetry,  
459 which will be followed throughout the 120 minute duration of the study visit, will be applied prior to  
460 study drug administration. After randomization, the blinded study medication will be obtained from the  
461 designated pyxis by the nurse, who will prepare and administer a weight based amount of the study  
462 treatment under the observation of the study staff. Of note, the end tidal capnometry cannula will  
463 briefly be removed while drug is administered and then immediately replaced. The patient will be  
464 observed on monitors for 15 minutes in the STS or designated area. (Currently, the mean time from  
465 arrival in STS for an orthopedic evaluation to leaving for radiology is 24 minutes so enrollment in this  
466 study should not prolong time in the STS or designated area.) The study staff will document vital signs,  
467 capnometry value, a sedation score and obtain a pain score from the patient at 15 minutes after drug  
468 administration. The nurse will document vital signs and a capnometry value at 15 minutes after drug  
469 administration. The patient will be taken to radiology for plain radiographs of the injured extremity and  
470 then to an emergency department room where the orthopedic evaluation nurse will give report to the  
471 patient's primary nurse. The study staff will document a sedation score, obtain a pain score, document  
472 vital signs and a capnometry value from the patient at 30 and 60 minutes from drug administration. At  
473 30 minutes, the study staff will also attempt to guess which medication the patient received and  
474 document this information in order to assess blinding of the study. At 120 minutes, a final set of vitals  
475 will be obtained and study staff will review all collected vitals and ask a study physician to record if vitals  
476 outside of the pre-determined normal ranges (see appendix G) are clinically significant or not clinically  
477 significant.

478  
479 Additional data collected during the ED visit will include the need for rescue analgesia within 60 minutes  
480 of drug administration and adverse events within 120 minutes of drug administration. Enrolled subjects  
481 will be followed for a minimum of 120 minutes after receiving the study medication in the emergency  
482 department. Currently, the mean total time orthopedic evaluation patients spend in the emergency  
483 department is 260 minutes so we do not anticipate that enrollment in this study will prolong ED visits.

484

### 485 **Rescue Medication Administration**

486  
487 At any time after receiving the study medication, the patient may request further analgesic medication  
488 which will be administered at the discretion of the treating PEM physician. Rescue analgesia does not  
489 require the patient to be withdrawn from the study.

490  
491 Subjects may be withdrawn from the study for the events listed below. Should this be necessary, the  
492 subject may be removed from the study and receive further medications and therapies at the discretion  
493 of the treating PEM physician.

494

### 495 **Subject Withdrawal**

496  
497 Subjects may withdraw from the study at any time without prejudice to their care. They may also be  
498 withdrawn from the study at the discretion of the investigator. The investigator or the sponsor may also  
499 withdraw subjects who violate the study plan, to protect the subject for reasons of safety or for  
500 administrative reasons. It will be documented whether or not each subject completes the clinical study.

501

## 502 **VISIT 2**

503



504 Visit 2 will conclude study participation and will consist of a phone follow up to the subject's parent or  
505 legal guardian to follow up on any ongoing adverse events from Visit 1 and to determine if any new  
506 adverse events occurred. The study team will attempt to reach the subject's parent by phone at least  
507 five times within the follow up timeframe (30 +/- 5 days) before considering the subject lost to follow  
508 up. Adverse events will be followed until resolution or until no further change is expected.

509

#### 510 **Drugs, Devices, and Biologics: (see Appendix F for further details)**

511 The intranasal route of administering medications had been reported for the past 20 years in the  
512 emergency care of pediatric patients. It has become a popular route of medication administration  
513 secondary to its rapid onset of action, minimal discomfort for the patient and relative simplicity. The  
514 nose contains a rich vascular supply with a relatively large surface area. Medications can be absorbed  
515 into vessels that lead to the superior vena cava bypassing first pass hepatic metabolism that limits  
516 bioavailability of oral medications.

517

#### 518 Intervention drug:

519 Ketamine (50 mg/mL) injectable solution is a nonbarbiturate anesthetic chemically designated *d,l* 2-(*o*-  
520 chlorophenyl)-2-(methylamino) cyclohexanone hydrochloride. It is formulated as a slightly acidic (pH  
521 3.5-5.5) sterile solution for intravenous or intramuscular injection in concentrations containing the  
522 equivalent of 50 mg ketamine base per milliliter and contains not more than 0.1 mg/mL Phemerol®  
523 (benzethonium chloride) added as a preservative.

524

#### 525 Human Pharmacokinetics:

526 Nielsen, et al in 2014 investigated a pediatric formulation of intranasal sufentanil 0.5 mcg/kg and  
527 ketamine 0.5 mg/kg for procedural pain and determined the bioavailability of ketamine was 35.8%.  
528 Maximum plasma concentration (C<sub>max</sub>) of ketamine was 0.102 mg/L (CV 10.8%) and T<sub>max</sub> was 8.5 min  
529 (CV 17.3%).

530

531 Malinovsky, et al in 1996 determined that after administration of intranasal ketamine in children 10-30  
532 kg, 2-9 years of age, mean plasma concentrations after 3 mg/kg peaked at 496 ng/mL at 20 minutes and  
533 after 9 mg/kg peaked at 2104 ng/mL within 21 minutes. Plasma concentrations of norketamine (the  
534 predominate active metabolite), peaked at ~120 minutes after nasal ketamine. Calculated bioavailability  
535 from nasal administration was 50%. The authors concluded that nasal administration of low doses of  
536 ketamine produced plasma concentrations associated with analgesia (40-200 mg/mL), but using high  
537 doses produced high plasma concentrations similar to those that induce anesthesia (1100 to over 2000  
538 ng/mL).

539

#### 540 Packaging:

541 The study medication is prepackaged by the distributor in individual sterile vials of 10 mL each.

542

#### 543 Labeling:

544 The product label reads "Ketamine HCL, Injection USP, Concentrate 500 mg/10 mL (50 mg/mL) for  
545 intramuscular or slow intravenous use, 10 x 10 mL multi-dose vials."

546

#### 547 Manufacturer:

548 Mylan Institutional LLC, Rockford, IL

#### 549 Dosing:

550 Ketamine is in individual sterile vials of 10 mL of solution. Investigational drug services will prepackage  
551 syringes with study medication using aseptic technique, cap the syringes and label each with a specific



552 study number. Using weight based categories, patients who are randomized to receive ketamine will  
553 receive a dose of 1.5 mg/kg with a max dose of 100 mg.

554

555 Comparator drug:

556 Fentanyl Citrate Injection, USP, CII (50 mcg/mL) is a sterile, nonpyrogenic solution of fentanyl citrate in  
557 water for injection. Fentanyl Citrate is a potent opioid agonist. Each milliliter contains fentanyl (as the  
558 citrate) 50 mcg (0.05 mg). It may contain sodium hydroxide and/or hydrochloric acid for pH adjustment.  
559 pH 4.7 (4.0 to 7.5). The solution contains no bacteriostat, antimicrobial agent or added buffer and is  
560 intended only for use as a single-dose injection.

561

562 Intranasal fentanyl is currently the standard of care in the Cincinnati Children’s Hospital Medical Center  
563 Emergency Department for the treatment of pain associated with acute extremity injuries prior to IV  
564 placement.

565

566 Human Pharmacokinetics

567 When fentanyl is administered by the intranasal route, the bioavailability is nearly 70%, with Tmax  
568 reached in 5–16 minutes.

569

570 Borland et al. conducted a study in 2002 looking at use of IN Fentanyl in pediatric patients (3-12 years of  
571 age) in the emergency department. With doses of 0.5-3.4 mcg/kg (median 1.5 mcg/kg), the authors  
572 found the drug achieved therapeutic levels and onset of analgesia within 10 minutes and had a half-life  
573 of 1 hour. The authors found it unlikely to cause respiratory compromise or hemodynamic instability  
574 based on no significant differences in HR, RR, BP, or oxygen saturations even with improvement in pain  
575 scores.

576

577 Packaging:

578 The study medication is packaged in 2 mL vials by the manufacturer.

579

580 Labeling:

581 The product label reads “Fentanyl Citrate, Injection USP, 100 mcg Fentanyl/2 mL (0.05 mg/mL) (50  
582 mcg/mL) IV or IM use, 2 mL single dose vial.”

583

584 Manufacturer:

585 West-Ward; Eatontown, NJ

586

587 Dosing:

588 Fentanyl is in individual sterile vials of 2 mL of solution. Investigational drug services will prepackage  
589 syringes of study medication using aseptic technique, cap the syringes and label each with a specific  
590 study number. Using weight based categories, patients who are randomized to receive Fentanyl will  
591 receive a dose of 2 mcg/kg with a max dose of 100 mcg.

592

593 Syringes with ketamine and fentanyl will look identical to maintain blinding. Syringes will expire after 9  
594 days. Subjects will receive either intranasal ketamine (1.5 mg/kg) or fentanyl (2 mcg/kg) by blinded  
595 syringe in a standardized volume. For analgesic dose volumes equal to and less than 0.5 mL, the entire  
596 dose will be administered in 1 of the nares. Doses greater than 0.5 mL will be divided equally to both  
597 nares.

598

599 Medications will be given via a mucosal atomizer device. The LMA MAD Nasal (MAD300) intranasal  
600 mucosal atomization device (Wolfe-Tory, Medical, Inc, Salt Lake City, UT) will be attached to the Luer-  
601 Lok syringe just before study drug administration to the patient. 0.1 mL of drug solution will be used to  
602 prime the MAD nasal device.

603  
604 These dosages and distribution of medication are similar to previous studies using intranasal ketamine  
605 and/or intranasal fentanyl in which there were no significant adverse effects observed [53, 60, 61, 67-  
606 69].

607  
608 Adequate records of study drug administration and disposition will be maintained by the Cincinnati  
609 Children’s Hospital Investigational Drug Services. The purpose of these records is to ensure regulatory  
610 authorities and the sponsor that the investigational drug will not be distributed to any person who is not  
611 a study subject under the terms and conditions set forth in this protocol. The study medication is to be  
612 prescribed by the members of this investigational team or designee and may not be used for any  
613 purpose other than that described in this protocol. At study completion, all drug supplies must be  
614 returned to the sponsor or designee.

615

## 616 **VIII. DATA ANALYSIS/METHODS**

617

### 618 **Data Collection and Management**

619

620 All data will be entered onto standardized electronic data reporting forms after initially being obtained  
621 on paper forms. The data reporting forms will contain the demographic, physical exam and treatment  
622 data outlined in this section. The forms will also contain the protected health information of subject  
623 name, visit date, contact information and medical record number. Data from the forms will be entered  
624 into a database. Protected health information will be entered into the database. The information will  
625 be de-identified after study completion.

626

627 Confidentiality will be maintained by using a locked cabinet in the research staff area and by maintaining  
628 password-protected databases and computers. The password for the database will only be known to the  
629 research study staff. Study files will be stored in a locked cabinet in the principal investigator’s office  
630 which has limited public access. Entry to the office is protected by CCHMC ID card entry. Study files will  
631 be de-identified after publication and retained for 3 years after study closure.

632

633 Additionally, data about missed eligible patients will be collected periodically through an EMR report  
634 and supplemented by chart review to assess screening hours, training needs or other issues that may  
635 inhibit staff’s ability to enroll. We are requesting a HIPAA waiver to review the patient charts via the  
636 MRN and day/time of arrival and no information will be used for analysis in the research study. Consent  
637 would not otherwise be possible for these participants because of the nature of presentation to the ED;  
638 it is possible that these patients will have arrived when no study staff is available. Data collected on  
639 missed eligible patients will include MRN, encounter ID, date/time of ED arrival and discharge, means of  
640 arrival, date of birth, gender, whether or not they met study inclusion/exclusion criteria, disposition,  
641 discharge diagnosis, and provider name.

642

### 643 **Primary Endpoint**

644

645 The primary endpoint is the difference between the mean reduction in pain scores between the  
646 ketamine group and the fentanyl group as measured by the visual analog scale (VAS) at 30 minutes after  
647 study intervention.

648  
649 The pain VAS is a unidimensional measure of pain intensity which has been widely used in diverse  
650 populations [66, 72, 73]. It is a continuous scale comprised of a horizontal or vertical line that is 10 cm  
651 (100 mm) in length anchored by two verbal descriptors representing pain extremes. The scale is most  
652 commonly anchored by “no pain” (score of 0) and “pain as bad as it could be” or “worst imaginable  
653 pain” (score of 100). To avoid clustering of scores around a preferred numeric value, numbers or verbal  
654 descriptors at intermediate points are not present. The patient is asked to place a line perpendicular to  
655 the VAS line at the point that represents their current pain intensity. Using a ruler, the score is  
656 determined by measuring the distance (mm) on the 10-cm line between the “no pain” anchor and the  
657 patient's mark, providing a range of scores from 0–100. The visual analog scale has been shown to be  
658 valid and reliable in children 8 to 17 years of age suffering from acute pain and that a minimum clinically  
659 significant difference in VAS score ranges from 10 to 12 mm in children and adolescents [65, 66]. The  
660 optimal cut points for mild, moderate and severe pain on the VAS for children and adolescents have  
661 been determined to be 35 and 60 mm [1].

### Visual Analog Scale

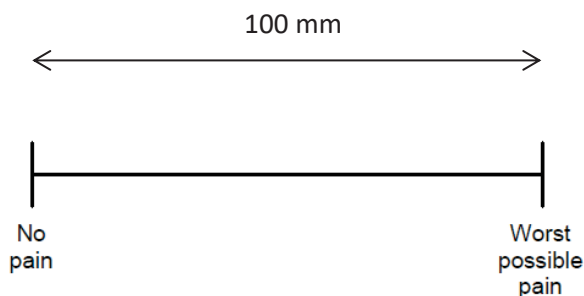

### 662 663 Secondary Endpoints

664  
665 The secondary endpoints are to:

- 666  
667     ▪ Define and compare the level of sedation associated with intranasal sub-dissociative  
668 ketamine (1.5 mg/kg) and intranasal fentanyl (2 mcg/kg) as measured by the University  
669 of Michigan Sedation Scale Score and capnometry values.
- 670     ▪ Compare adverse effects associated with intranasal sub-dissociative ketamine and  
671 intranasal fentanyl
- 672     ▪ Compare vital sign changes associated with intranasal sub-dissociative ketamine and  
673 intranasal fentanyl

674  
675 An additional secondary endpoint will be the difference between the ketamine group and the fentanyl  
676 group in pain score as measured by the visual analog scale at 15 and 60 minutes after study  
677 intervention.

### 678 679 Screening and Baseline Evaluation

#### 680 681 Physical Examination

682  
683 Baseline evaluation will include a physical examination and demographics as are routinely performed  
684 during the orthopedic evaluation process. Items recorded from physical examination will be weight and  
685 extremity injured. An exam of the nasal mucosa will be performed, and a nasal smell test will be  
686 administered prior to drug treatment and at 120 minutes post treatment. Demographic data recorded  
687 will include age, gender, ethnicity and race.

688 If there is a discrepancy between the information provided by the parent and information provided in  
689 the chart, the information provided by the parent will be used.

690 **Vital signs**

691  
692 Vital sign data will be recorded at baseline, 15 minutes, 30 minutes, 60 minutes, and 120 minutes. It will  
693 include heart rate, respiratory rate, blood pressure, oxygen saturation and end tidal capnometry value.  
694 However, an end tidal capnometry value will not be obtained at the 120 minute assessment. Oxygen  
695 saturation levels and capnometry values will be obtained from the cardio-respiratory monitor once an  
696 appropriate waveform is obtained. Cardio-respiratory monitoring with pulse oximetry will be continuous  
697 for 120 minutes after the study medication is administered.

698

699 **Table 5. Covariates**

|                                       |
|---------------------------------------|
| Age                                   |
| Gender                                |
| Race                                  |
| Insurance status                      |
| Weight                                |
| Time to medication from injury        |
| Time to medication from arrival to ED |
| Injury Type                           |
| Extremity injured                     |
| Mechanism of injury                   |

700

701 **Other Evaluations/Measures**

702 A urine or serum pregnancy test will be collected from all post menarchal females, and results must be  
703 negative before drug treatment may be initiated.

704

705 Visual analog scale pain scores will be obtained by study staff as described above.

706

707 University of Michigan Sedation Scale (UMSS) scores will also be obtained at baseline, 15, 30 and 60  
708 minutes after study intervention. The University of Michigan Sedation Scale is a valid and reliable tool  
709 that allows for rapid assessment of the depth of sedation in children. It is a simple observational tool  
710 that assesses the level of alertness on a five-point scale [74]. It has been validated in children and has  
711 shown to have significant inter-rater reliability.

712

| UMSS | Clinical Features                                                                                                |
|------|------------------------------------------------------------------------------------------------------------------|
| 0    | Awake and alert                                                                                                  |
| 1    | Minimally sedated; tired/sleepy, appropriate response to verbal conversation and/or sound                        |
| 2    | Moderately sedated; somnolent/sleeping, easily aroused with light tactile stimulation or a simple verbal command |
| 3    | Deeply sedated; deep sleep, arousable only with significant physical stimulation                                 |
| 4    | Unarousable                                                                                                      |

UMSS = University of Michigan Sedation Scale.

713  
714

## 715 **Efficacy Evaluations**

716

### 717 **Diagnostic Tests, Scales, Measures**

718

719 A VAS score, UMSS sedation score and vital signs will be obtained at study entry and at 15 minutes, 30  
720 minutes and 60 minutes after administration of study medication. Changes between these time points  
721 will be evaluated. The time from initial physician evaluation to study medication and to ED disposition  
722 will be recorded. Adjunct measures including additional analgesia or anti-emetics will be recorded.

723

724 Of note, pain scores, sedation scores, vital signs, capnometry values, and adverse effects will be  
725 obtained at specific windows of time such that the “15 minute” value will be obtained between 10 and  
726 20 minutes after medication is given, “30 minute” value will be obtained between 25 and 35 minutes  
727 after medication is given, “60 minute” value will be obtained between 55 and 65 minutes after  
728 medication is given and “120 minute” value will be obtained between 120 and 150 minutes after  
729 medication is given.

730

### 731 **Statistical Methods**

732

#### 733 **Baseline Data**

734

735 Baseline and demographic characteristics will be summarized by standard descriptive summary  
736 statistics. This will include means and standard deviations for continuous variables expected to be  
737 normally distributed, such as age, vital signs, capnometry values, weight and VAS pain scores;  
738 proportions for categorical variables such as gender, race and injury location; and medians with ranges  
739 for variables expected to not be normally distributed, such as UMSS sedation scores. All continuous  
740 variables will be assessed for normality; parametric statistics will be used for normally distributed  
741 variables and non-parametric statistics will be used for non-normally distributed variables.

742

#### 743 **Efficacy Analysis**

744

745 The primary analysis will include all subjects randomized based on the principle of intention to treat. If  
746 necessary, a per-protocol analysis will also be performed to assess efficacy of the treatments actually  
747 received. The primary efficacy endpoint will be the difference in mean pain scores between the

748 ketamine group and the fentanyl group at 30 minutes after study intervention. This difference will be  
749 evaluated using the t-test.

750  
751 Demographic and historical baseline information of the 2 study groups will be compared using t-tests  
752 (means), Mann-Whitney U (medians), and chi-square (proportions) tests. If there are any significant  
753 differences, linear regression will be performed to adjust for significantly different covariates.

754  
755 For secondary outcomes, t-tests, or Mann-Whitney U where appropriate, will be used to evaluate  
756 differences in continuous outcomes (e.g. heart rate, blood pressure). Chi-square tests will be used to  
757 evaluate proportions in dichotomous outcomes (e.g. proportion with presence of specific adverse  
758 effects). Risk differences with 95% confidence intervals will be used to compare dichotomous outcomes  
759 such as the use of rescue analgesia and adverse events.

760  
761  
762

### 763 **Safety Analysis**

764  
765 All subjects entered into the study will be included in the safety analysis. The frequencies of adverse  
766 events, including type, body system, severity and relationship to the study drug, will be summarized. We  
767 do not anticipate any serious adverse events. However, if one were to occur, it would be described in  
768 detail.

769  
770 Adverse event incidence will be summarized along with the corresponding exact binomial 95% two-  
771 sided confidence intervals.

772

### 773 **Test of Non-Inferiority**

774  
775 A one-sided two-sample t-test will be used to test whether the pain reduction using ketamine is non-  
776 inferior to that of fentanyl. When the variances of the two groups are unequal, Welch's t-test will be  
777 used; if the data are not normally distributed, the Mann-Whitney (Wilcoxon signed rank) U test will be  
778 used [75, 76].

779

### 780 **Interim Analysis**

781  
782 Due to the expected short duration of the study, no interim analysis will be performed. However,  
783 ongoing safety analysis of adverse events, serious adverse events and toxicities will be done.

784

## 785 **IX. FACILITIES AND PERFORMANCE SITES**

786  
787 The study will be conducted at one investigative site in the United States. Cincinnati Children's Hospital  
788 Medical Center is an academic, freestanding, 523 bed children's hospital with 32,981 admissions and  
789 125,130 Emergency Department visits annually. The population is diverse and includes 51% Caucasian,  
790 40% African American, 2% Hispanic, and 7% other. Study enrollment will only be performed at the base  
791 campus.

792

## 793 **X. POTENTIAL BENEFITS**

794

795 Intranasal sub-dissociative dosing of ketamine has been shown in multiple studies to provide adequate  
796 analgesia to pediatric patients experiencing moderate to severe pain. Therefore, patients receiving the  
797 study medication may receive adequate analgesia and avoid the side effects associated with opioids and  
798 potentially the increased chance of adverse effects as a result of opioids in combination with ketamine  
799 procedural sedation later during their ED visit. Furthermore, patients who are genetically predisposed to  
800 have poor opioid sensitivity or those who have developed opioid tolerance due to other chronic painful  
801 conditions may find more benefit with the study medication.

802

## 803 **XI. POTENTIAL RISKS, DISCOMFORTS, INCONVENIENCES and PRECAUTIONS**

804

805 There are minimal risks associated with the administration of sub-dissociative ketamine via the  
806 intranasal route. All studies performed using intranasal ketamine at sub-dissociative dosing in children  
807 showed only minimal adverse events and no serious adverse events associated with the study  
808 medication. Examples of mild adverse events which could be expected to occur with both medications  
809 include drowsiness, dizziness, pruritus, nausea, vomiting, dysphoria, unpleasant taste, vision changes,  
810 throat irritation, headache, and mild increase in heart rate and blood pressure.

811

812 Based on pharmacokinetic studies on intranasal ketamine use in children, the mean plasma  
813 concentrations peaked at about 20 minutes and the plasma concentrations of norketamine (the  
814 predominate active metabolite), peaked at about 120 minutes after administration of intranasal  
815 ketamine. Subjects will be observed in the emergency department for a minimum of 2 hours after study  
816 medication administration, thus providing resources and personnel for immediate, emergency care  
817 should the need arise. Those patients who are admitted and remain in the ED less than 2 hours will be  
818 monitored for the entirety of their ED stay. The admitting team will then be notified that they received a  
819 study medication. This length of observation is consistent with the amount of time that patients who are  
820 triaged as an orthopedic evaluation spend in the ED for standard therapy as most of these patients tend  
821 to remain in the ED for longer than two hours. This observation time does not pose any increased risk to  
822 the patient. Those patients discharged from the ED will be provided appropriate follow up instructions  
823 as per standard of care.

824

825 For these reasons, we expect enrollment in this trial to be of minimal risk to patients.

826

## 827 **XII. RISK/BENEFIT ANALYSIS**

828

829 Due to the prospect of direct benefit to patients and minimal risk to patients, the risk-benefit ratio  
830 seems favorable to patients, parents and providers.

831

## 832 **XIII. DATA AND SAFETY MONITORING**

833

### 834 **Clinical Adverse Events**

835

836 Clinical adverse events (AEs) will be monitored throughout the study. All adverse events will be followed  
837 until resolution.

838

### 839 **Adverse Event Reporting**

840



841 All on-site serious adverse events will be reported to the IRB in accordance with CCHMC IRB policies.  
842 Adverse Events will be reported to the IRB per CCHMC Research Policy R-18.

843

### 844 **Definition of an Adverse Event**

845

846 An adverse event is any untoward medical occurrence in a subject who has received an intervention  
847 (drug, biologic, or other intervention). The occurrence does not necessarily have to have a causal  
848 relationship with the treatment. An AE can therefore be any unfavorable or unintended sign (including  
849 an abnormal laboratory finding, for example), symptom, or disease temporally associated with the use  
850 of a medicinal product, whether or not considered related to the medicinal product. Adverse event  
851 monitoring for the emergency department phase would start at the time of randomization and end at  
852 two hours after initial medication administration. Any additional adverse events that occur beyond 120  
853 minutes after initial medication administration will be obtained during the 30 day follow up phone call.

854

855 All AEs (including serious AEs) will be noted in the study records and on the case report form with a full  
856 description including the nature, date and time of onset, determination of non-serious versus serious,  
857 intensity (mild, moderate, severe), duration, causality, and outcome of the event. SAEs will be reported  
858 within 24 hours.

859

### 860 **Definition of a Serious Adverse Event (SAE)**

861

862 An SAE is any adverse drug experience occurring at any dose that results in any of the following  
863 outcomes:

864

- death

865

- a life-threatening event (at risk of death at the time of the event)

866

- requires inpatient hospitalization or prolongation of existing hospitalization

867

- a persistent or significant disability/incapacity

868

- results in a congenital anomaly or birth defect

869 Important medical events that may not result in death, be life-threatening, or require hospitalization  
870 may be considered a serious adverse drug event when, based upon appropriate medical judgment, they  
871 may jeopardize the subject and may require medical or surgical intervention to prevent one of the  
872 outcomes listed in this definition. The one exception to these criteria is hospitalization for repair and/or  
873 pain management associated with the injury. Since this can be expected as part of the standard  
874 treatment course for orthopedic injuries, admissions for this reason will not be reported as a serious  
875 adverse event. However, all admissions will be tracked and those related to adverse events or for  
876 reasons other than injury repair or pain management will be reported as an SAE.

877

878 Serious adverse event monitoring starts at the time of consent and ends at the time of discharge or  
879 admission. All SAEs will be followed until resolution, the event is considered to be medically stable, or  
880 for 30 days after the subject completes the study, whichever occurs first.

881

882 A distinction should be drawn between serious and severe AEs. A severe AE is a major event of its type.  
883 A severe AE does not necessarily need to be considered serious. For example, nausea which persists for  
884 several hours may be considered severe nausea, but would not be an SAE. On the other hand, a stroke  
885 that results in only a limited degree of disability may be considered a mild stroke, but would be an SAE.

886

887 **Serious Adverse Events (SAEs) Specific to this Study**

888

889 There has been documentation of a few significant adverse effects associated with the medications  
890 included in this study. These effects are exceedingly rare and are anticipated to be even rarer through  
891 an intranasal route of drug administration compared with an intravenous route and with sub-  
892 dissociative dosing of ketamine as compared with dissociative dosing.

893

894 Ketamine: cardiac arrhythmia, hypertensive emergency, prolonged emergence reaction, anaphylaxis,  
895 laryngospasm, apnea

896

897 Fentanyl: cardiac arrhythmia, cardiopulmonary arrest, chest wall rigidity, hypertensive emergency,  
898 hypotension, pulmonary embolism, anaphylaxis, apnea, bronchospasm, laryngospasm

899

900 In the exceedingly rare instance that one of these serious adverse effects was to occur, the patient  
901 would be treated for that particular emergency in a manner that is standard of care at CCHMC were the  
902 emergency to occur in any other setting.

903

904 **Relationship of SAE to study drug or other intervention**

905

906 The relationship of each SAE to the study intervention should be characterized using one of the  
907 following terms in accordance with CCHMC IRB Guidelines: definitely, probably, possibly, or unrelated.

908

909 **Monitoring Plan**

910

911 The medical monitor is the person responsible for the safety monitoring in this protocol and he will  
912 monitor all clinically significant adverse events (AEs) and provide consultation for any AEs that the  
913 investigators question the classification, severity or relatedness originally documented at the time of the  
914 ED visit. The medical monitor will be Scott Reeves, MD. He is a member of the Division of Emergency  
915 Medicine, who will not be involved with enrollment.

916

917 A risk-based monitoring plan will be developed for the conduct of study monitoring. On-site monitoring  
918 will occur throughout the duration of the study. A study initiation visit will be conducted by the study  
919 monitoring staff to ensure that the study staff have been completely trained in protocol procedures and  
920 Good Clinical Practices (GCP) and that facilities and personnel are adequate. Scheduled monitoring will  
921 occur at least once per year during the conduct of the trial, with the option of making a second visit if  
922 needed to address over-enrollment, under-enrollment, or protocol deviation issues. The Monitoring  
923 Plan will detail the frequency and level of intensity of on-site monitoring visits. In general, the study will  
924 be monitored for all subjects at a level of 100% of study data gathered for inclusion and exclusion  
925 criteria, informed consent procedures, and adverse events. At a minimum, at least 20% of the study  
926 subject's data will be monitored against the study's database.

927

928 During scheduled interim monitoring visits, the monitors will verify that the protocol is being followed  
929 and that data are being collected according to protocol requirements. The monitors will review the  
930 Study Regulatory File to determine that all required documentation is being collected and that the IRB  
931 approval for the study is current. They will then verify that each subject has signed the correct version  
932 of the informed consent document, and that this document is filed in the subject's file. Adverse event  
933 documentation is checked for completeness and accuracy. Drug and supplies accountability will also be

934 monitored. At the study closeout, the monitors confirm that all data have been reviewed, all source  
 935 documents have been verified, and all required documents are present in the Study Regulatory File. The  
 936 table below describes the variables to be reviewed during monitoring visits.  
 937

| Variable                                                  | % of Records Reviewed  |
|-----------------------------------------------------------|------------------------|
| Informed consents                                         | 100%                   |
| Eligibility criteria for all screened subjects            | 100%                   |
| Adverse events                                            | 100%                   |
| Drug accountability                                       | 20% of active subjects |
| Protocol adherence                                        | 20% of active subjects |
| Verification of eCRFs with source documents               | 20% of active subjects |
| Central study files-inclusion of all applicable documents | 100%                   |
| Protocol deviations/violations                            | 100%                   |

938  
 939 AEs will be reported to the IRB as detailed below. Adverse events will be recorded on the study data  
 940 form by the study team. Any serious adverse events (SAEs) will be reported to the investigator or  
 941 designee immediately. Study forms and charts will be reviewed by the study coordinator and principal  
 942 investigator for AEs after the ED visit. All identified AEs will be recorded. The investigator will determine  
 943 the grade and attribution. If unblinding is required, the investigator will notify the IRB. The protocol and  
 944 consent will be reviewed by the investigator to determine if any changes are required. SAE's that are  
 945 related to the study and unexpected will be reported to the IRB and FDA. Any serious adverse events  
 946 and/or adverse events that occur during the study will be followed to resolution.

947  
 948 For the purpose of this study, toxicity is defined using the Common Terminology Criteria for Adverse  
 949 Events (CTCAE) v4.0 as defined by the National Cancer Institute  
 950 (<http://ctep.cancer.gov/reporting/ctc.html>).

951  
 952 Grade level 4 or greater toxicity which are unexpected and related to the study will be reported to the  
 953 IRB within 48 hours. Examples pertinent to this protocol include: life threatening respiratory  
 954 compromise resulting in intubation, anaphylaxis, hypotension, hypertensive crisis, life-threatening  
 955 cardiac arrhythmias requiring urgent intervention, nausea and emesis with life-threatening  
 956 consequences, and change in mental status including states harmful to the subject.

957  
 958 Subjects will be withdrawn from study drug exposure if any of the following events occur during the  
 959 patient's stay in the ED:

- 960     ▪ The subject has a SAE possibly or definitely related to the study drug
- 961     ▪ The subject experiences a level 4 toxicity as defined by CTCAE
- 962     ▪ The subject experiences one or more level 3 toxicities as defined by CTCAE
- 963     ▪ The subject has an adverse event experience that would, in the investigator's judgment, make  
 964 continued participation in the study not in the subject's best medical interest.

965  
 966 The trial will stop enrollment for the following events:

- 967     ▪ A SAE rate related to the study intervention of greater than or equal to 2 in 10 subjects is  
 968 detected
- 969     ▪ Subjects experiencing grade 3 toxicities occur more frequently than 3 in 10 subjects.

970

971 If the trial is stopped for the above events, a complete report of the events, AEs and SAEs will be  
972 provided to the IRB and FDA for review. The protocol and consent will be reviewed and any  
973 recommendations for revisions will be approved by the IRB before enrollment is reopened.

974

975 **XIV. PRIVACY AND CONFIDENTIALITY**

976

977 All data and records generated during this study will be kept confidential in accordance with institutional  
978 policies and HIPAA on subject privacy and that the investigator and other site personnel will not use  
979 such data and records for any purpose other than conducting the study. Safeguards to maintain  
980 confidentiality are discussed in Section VIII.

981

982

983 **XV. COST OF PARTICIPATION**

984

985 Third party payers and participants will not be billed for research procedures described.

986

987 **XVI. PAYMENT FOR PARTICIPATION**

988

989 Participants who complete the ED study procedures will be compensated with a \$10 gift card for their  
990 time and effort towards the study.

991

992 **REFERENCES:**

993

994

995 1. Hirschfeld, G. and B. Zernikow, *Cut points for mild, moderate, and severe pain on the VAS for*  
996 *children and adolescents: what can be learned from 10 million ANOVAs?* Pain, 2013. **154**(12): p.  
997 2626-32.

998 2. Institute of Medicine Committee on Advancing Pain Research, C. and Education, *The National*  
999 *Academies Collection: Reports funded by National Institutes of Health*, in *Relieving Pain in*  
1000 *America: A Blueprint for Transforming Prevention, Care, Education, and Research*. 2011, National  
1001 Academies Press (US)

1002 National Academy of Sciences.: Washington (DC).

1003 3. Motov, S.M. and A.N. Khan, *Problems and barriers of pain management in the emergency*  
1004 *department: Are we ever going to get better?* J Pain Res, 2008. **2**: p. 5-11.

1005 4. Rupp, T. and K.A. Delaney, *Inadequate analgesia in emergency medicine*. Ann Emerg Med, 2004.  
1006 **43**(4): p. 494-503.

1007 5. Rawlins, J.M., et al., *Epidemiology and outcome analysis of 208 children with burns attending an*  
1008 *emergency department*. Pediatr Emerg Care, 2007. **23**(5): p. 289-93.

1009 6. O'Donnell, J., L.P. Ferguson, and T.F. Beattie, *Use of analgesia in a paediatric accident and*  
1010 *emergency department following limb trauma*. Eur J Emerg Med, 2002. **9**(1): p. 5-8.

1011 7. Dong, L., et al., *Analgesic administration in the emergency department for children requiring*  
1012 *hospitalization for long-bone fracture*. Pediatr Emerg Care, 2012. **28**(2): p. 109-14.

1013 8. Brown, J.C., et al., *Emergency department analgesia for fracture pain*. Ann Emerg Med, 2003.  
1014 **42**(2): p. 197-205.

- 1015 9. Petrack, E.M., N.C. Christopher, and J. Kriwinsky, *Pain management in the emergency*  
1016 *department: patterns of analgesic utilization*. Pediatrics, 1997. **99**(5): p. 711-4.
- 1017 10. Alexander, J. and M. Manno, *Underuse of analgesia in very young pediatric patients with*  
1018 *isolated painful injuries*. Ann Emerg Med, 2003. **41**(5): p. 617-22.
- 1019 11. Boccio, E., et al., *The relationship between patient age and pain management of acute long-bone*  
1020 *fracture in the ED*. Am J Emerg Med, 2014. **32**(12): p. 1516-9.
- 1021 12. Del Pizzo, J. and J.M. Callahan, *Intranasal medications in pediatric emergency medicine*. Pediatr  
1022 Emerg Care, 2014. **30**(7): p. 496-501; quiz 502-4.
- 1023 13. Mazer-Amirshahi, M., et al., *Trends in prescription opioid use in pediatric emergency department*  
1024 *patients*. Pediatr Emerg Care, 2014. **30**(4): p. 230-5.
- 1025 14. Goldman, R.D., et al., *Predictors for opioid analgesia administration in children with abdominal*  
1026 *pain presenting to the emergency department*. Clin J Pain, 2008. **24**(1): p. 11-5.
- 1027 15. Porter, R.N., et al., *Poor access to timely pain reduction interventions for pediatric patients with*  
1028 *supracondylar humerus fracture*. Pediatr Emerg Care, 2013. **29**(7): p. 796-800.
- 1029 16. Bijur, P.E., M.K. Kenny, and E.J. Gallagher, *Intravenous morphine at 0.1 mg/kg is not effective for*  
1030 *controlling severe acute pain in the majority of patients*. Ann Emerg Med, 2005. **46**(4): p. 362-7.
- 1031 17. Nagashima, M., et al., *Is there genetic polymorphism evidence for individual human sensitivity to*  
1032 *opiates?* Curr Pain Headache Rep, 2007. **11**(2): p. 115-23.
- 1033 18. Ikeda, K., et al., *How individual sensitivity to opiates can be predicted by gene analyses*. Trends  
1034 Pharmacol Sci, 2005. **26**(6): p. 311-7.
- 1035 19. Jennings, P.A., et al., *Morphine and ketamine is superior to morphine alone for out-of-hospital*  
1036 *trauma analgesia: a randomized controlled trial*. Ann Emerg Med, 2012. **59**(6): p. 497-503.
- 1037 20. Ahern, T.L., et al., *Effective analgesia with low-dose ketamine and reduced dose hydromorphone*  
1038 *in ED patients with severe pain*. Am J Emerg Med, 2013. **31**(5): p. 847-51.
- 1039 21. Johansson, P., P. Kongstad, and A. Johansson, *The effect of combined treatment with morphine*  
1040 *sulphate and low-dose ketamine in a prehospital setting*. Scand J Trauma Resusc Emerg Med,  
1041 2009. **17**: p. 61.
- 1042 22. Lester, L., et al., *Low-dose ketamine for analgesia in the ED: a retrospective case series*. Am J  
1043 Emerg Med, 2010. **28**(7): p. 820-7.
- 1044 23. Richards, J.R. and R.E. Rockford, *Low-dose ketamine analgesia: patient and physician experience*  
1045 *in the ED*. Am J Emerg Med, 2013. **31**(2): p. 390-4.
- 1046 24. Beaudoin, F.L., et al., *Low-dose ketamine improves pain relief in patients receiving intravenous*  
1047 *opioids for acute pain in the emergency department: results of a randomized, double-blind,*  
1048 *clinical trial*. Acad Emerg Med, 2014. **21**(11): p. 1193-202.
- 1049 25. Galinski, M., et al., *Management of severe acute pain in emergency settings: ketamine reduces*  
1050 *morphine consumption*. Am J Emerg Med, 2007. **25**(4): p. 385-90.
- 1051 26. Gurnani, A., et al., *Analgesia for acute musculoskeletal trauma: low-dose subcutaneous infusion*  
1052 *of ketamine*. Anaesth Intensive Care, 1996. **24**(1): p. 32-6.
- 1053 27. Motov, S., et al., *Intravenous Subdissociative-Dose Ketamine Versus Morphine for Analgesia in*  
1054 *the Emergency Department: A Randomized Controlled Trial*. Ann Emerg Med, 2015.
- 1055 28. Miller, J.P., et al., *Low-dose ketamine vs morphine for acute pain in the ED: a randomized*  
1056 *controlled trial*. Am J Emerg Med, 2015. **33**(3): p. 402-8.
- 1057 29. Messenger, D.W., et al., *Subdissociative-dose ketamine versus fentanyl for analgesia during*  
1058 *propofol procedural sedation: a randomized clinical trial*. Acad Emerg Med, 2008. **15**(10): p. 877-  
1059 86.
- 1060 30. Svenson, J.E. and M.K. Abernathy, *Ketamine for prehospital use: new look at an old drug*. Am J  
1061 Emerg Med, 2007. **25**(8): p. 977-80.



- 1062 31. Andolfatto, G., et al., *Intranasal ketamine for analgesia in the emergency department: a*  
1063 *prospective observational series*. Acad Emerg Med, 2013. **20**(10): p. 1050-4.
- 1064 32. Yeaman, F., et al., *Sub-dissociative-dose intranasal ketamine for moderate to severe pain in adult*  
1065 *emergency department patients*. Emerg Med Australas, 2014. **26**(3): p. 237-42.
- 1066 33. Huges, V., et al., *Effects of low-dose intranasal (S)-ketamine in patients with neuropathic pain*. Eur  
1067 J Pain, 2010. **14**(4): p. 387-94.
- 1068 34. Carr, D.B., et al., *Safety and efficacy of intranasal ketamine for the treatment of breakthrough*  
1069 *pain in patients with chronic pain: a randomized, double-blind, placebo-controlled, crossover*  
1070 *study*. Pain, 2004. **108**(1-2): p. 17-27.
- 1071 35. Christensen, K., et al., *Safety and efficacy of intranasal ketamine for acute postoperative pain*.  
1072 Acute Pain, 2007. **9**(4): p. 183-192.
- 1073 36. Abdel-Ghaffar, H.S. and M.A. Salem, *Safety and Analgesic Efficacy of Pre-Emptive Intranasal*  
1074 *Ketamine versus Intranasal Fentanyl in Patients Undergoing Endoscopic Nasal Surgery*. Journal  
1075 of American Science, 2012. **8**(3).
- 1076 37. Afridi, S.K., et al., *A randomized controlled trial of intranasal ketamine in migraine with*  
1077 *prolonged aura*. Neurology, 2013. **80**(7): p. 642-7.
- 1078 38. Riediger, C., et al., *The analgesic effect of combined treatment with intranasal S-ketamine and*  
1079 *intranasal midazolam compared with morphine patient-controlled analgesia in spinal surgery*  
1080 *patients: a pilot study*. J Pain Res, 2015. **8**: p. 87-94.
- 1081 39. Green, S.M., et al., *Clinical practice guideline for emergency department ketamine dissociative*  
1082 *sedation: 2011 update*. Ann Emerg Med, 2011. **57**(5): p. 449-61.
- 1083 40. Visser, E. and S.A. Schug, *The role of ketamine in pain management*. Biomed Pharmacother,  
1084 2006. **60**(7): p. 341-8.
- 1085 41. Finkel, J.C., S.R. Pestieau, and Z.M. Quezado, *Ketamine as an adjuvant for treatment of cancer*  
1086 *pain in children and adolescents*. J Pain, 2007. **8**(6): p. 515-21.
- 1087 42. White, M.C., et al., *Pain management in 100 episodes of severe mucositis in children*. Paediatr  
1088 Anaesth, 2011. **21**(4): p. 411-6.
- 1089 43. Taylor, M., et al., *Ketamine PCA for Treatment of End-of-Life Neuropathic Pain in Pediatrics*. Am J  
1090 Hosp Palliat Care, 2014.
- 1091 44. Zempsky, W.T., et al., *Use of low-dose ketamine infusion for pediatric patients with sickle cell*  
1092 *disease-related pain: a case series*. Clin J Pain, 2010. **26**(2): p. 163-7.
- 1093 45. Dahmani, S., et al., *Ketamine for perioperative pain management in children: a meta-analysis of*  
1094 *published studies*. Paediatr Anaesth, 2011. **21**(6): p. 636-52.
- 1095 46. Dal, D., et al., *The efficacy of intravenous or peritonsillar infiltration of ketamine for*  
1096 *postoperative pain relief in children following adenotonsillectomy*. Paediatr Anaesth, 2007.  
1097 **17**(3): p. 263-9.
- 1098 47. Kennedy, R.M., et al., *Comparison of fentanyl/midazolam with ketamine/midazolam for*  
1099 *pediatric orthopedic emergencies*. Pediatrics, 1998. **102**(4 Pt 1): p. 956-63.
- 1100 48. Bredmose, P.P., et al., *Pre-hospital use of ketamine in paediatric trauma*. Acta Anaesthesiol  
1101 Scand, 2009. **53**(4): p. 543-5.
- 1102 49. White, M.C. and C. Karsli, *Long-term use of an intravenous ketamine infusion in a child with*  
1103 *significant burns*. Paediatr Anaesth, 2007. **17**(11): p. 1102-4.
- 1104 50. White, M., et al., *Pain management in fulminating ulcerative colitis*. Paediatr Anaesth, 2006.  
1105 **16**(11): p. 1148-52.
- 1106 51. Tsze, D.S., et al., *Intranasal ketamine for procedural sedation in pediatric laceration repair: a*  
1107 *preliminary report*. Pediatr Emerg Care, 2012. **28**(8): p. 767-70.
- 1108 52. Reid, C., R. Hatton, and P. Middleton, *Case report: prehospital use of intranasal ketamine for*  
1109 *paediatric burn injury*. Emerg Med J, 2011. **28**(4): p. 328-9.

- 1110 53. Johansson, J., et al., *Prehospital analgesia using nasal administration of S-ketamine--a case*  
1111 *series*. Scand J Trauma Resusc Emerg Med, 2013. **21**: p. 38.
- 1112 54. Roelofse, J.A., et al., *Intranasal sufentanil/midazolam versus ketamine/midazolam for*  
1113 *analgesia/sedation in the pediatric population prior to undergoing multiple dental extractions*  
1114 *under general anesthesia: a prospective, double-blind, randomized comparison*. Anesth Prog,  
1115 2004. **51**(4): p. 114-21.
- 1116 55. Bahetwar, S.K., et al., *A comparative evaluation of intranasal midazolam, ketamine and their*  
1117 *combination for sedation of young uncooperative pediatric dental patients: a triple blind*  
1118 *randomized crossover trial*. J Clin Pediatr Dent, 2011. **35**(4): p. 415-20.
- 1119 56. Khatavkar, S.S. and R.G. Bakhshi, *Comparison of nasal Midazolam with Ketamine versus nasal*  
1120 *Midazolam as a premedication in children*. Saudi J Anaesth, 2014. **8**(1): p. 17-21.
- 1121 57. Gyanesh, P., et al., *Comparison between intranasal dexmedetomidine and intranasal ketamine*  
1122 *as premedication for procedural sedation in children undergoing MRI: a double-blind,*  
1123 *randomized, placebo-controlled trial*. J Anesth, 2014. **28**(1): p. 12-8.
- 1124 58. Buonsenso, D., et al., *Utility of intranasal Ketamine and Midazolam to perform gastric aspirates*  
1125 *in children: a double-blind, placebo controlled, randomized study*. BMC Pediatr, 2014. **14**: p. 67.
- 1126 59. Nielsen, B.N., et al., *Intranasal sufentanil/ketamine analgesia in children*. Paediatr Anaesth,  
1127 2014. **24**(2): p. 170-80.
- 1128 60. Graudins, A., et al., *The PICHFORK (Pain in Children Fentanyl or Ketamine) Trial: A Randomized*  
1129 *Controlled Trial Comparing Intranasal Ketamine and Fentanyl for the Relief of Moderate to*  
1130 *Severe Pain in Children With Limb Injuries*. Ann Emerg Med, 2015. **65**(3): p. 248-254.e1.
- 1131 61. Yeaman, F., et al., *Sub-dissociative dose intranasal ketamine for limb injury pain in children in the*  
1132 *emergency department: a pilot study*. Emerg Med Australas, 2013. **25**(2): p. 161-7.
- 1133 62. Losek, J.D. and S. Reid, *Effects of initial pain treatment on sedation recovery time in pediatric*  
1134 *emergency care*. Pediatr Emerg Care, 2006. **22**(2): p. 100-3.
- 1135 63. Tran, K.P., et al., *A comparison of ketamine and morphine analgesia in prehospital trauma care:*  
1136 *a cluster randomized clinical trial in rural Quang Tri province, Vietnam*. Prehosp Emerg Care,  
1137 2014. **18**(2): p. 257-64.
- 1138 64. Elhakim, M., et al., *Ketamine reduces swallowing-evoked pain after paediatric tonsillectomy*.  
1139 Acta Anaesthesiol Scand, 2003. **47**(5): p. 604-9.
- 1140 65. Powell, C.V., A.M. Kelly, and A. Williams, *Determining the minimum clinically significant*  
1141 *difference in visual analog pain score for children*. Ann Emerg Med, 2001. **37**(1): p. 28-31.
- 1142 66. Bailey, B., J. Gravel, and R. Daoust, *Reliability of the visual analog scale in children with acute*  
1143 *pain in the emergency department*. Pain, 2012. **153**(4): p. 839-42.
- 1144 67. Saunders, M., K. Adelgais, and D. Nelson, *Use of intranasal fentanyl for the relief of pediatric*  
1145 *orthopedic trauma pain*. Acad Emerg Med, 2010. **17**(11): p. 1155-61.
- 1146 68. Borland, M., et al., *A randomized controlled trial comparing intranasal fentanyl to intravenous*  
1147 *morphine for managing acute pain in children in the emergency department*. Ann Emerg Med,  
1148 2007. **49**(3): p. 335-40.
- 1149 69. Borland, M.L., I. Jacobs, and G. Geelhoed, *Intranasal fentanyl reduces acute pain in children in*  
1150 *the emergency department: a safety and efficacy study*. Emerg Med (Fremantle), 2002. **14**(3): p.  
1151 275-80.
- 1152 70. Borland, M., S. Milsom, and A. Esson, *Equivalency of two concentrations of fentanyl*  
1153 *administered by the intranasal route for acute analgesia in children in a paediatric emergency*  
1154 *department: a randomized controlled trial*. Emerg Med Australas, 2011. **23**(2): p. 202-8.
- 1155 71. *Guidance for Clinical Investigators, Sponsors and IRBs: Investigational New Drug Applications*  
1156 *(INDs)--Determining Whether Human Research Studies Can Be Conducted Without an IND*. [PDF]  
1157 2013 September; 1-20]. Available from:



1158 <http://www.fda.gov/Drugs/DevelopmentApprovalProcess/HowDrugsareDevelopedandApproved/ApprovalApplications/InvestigationalNewDrugINDApplication/ucm362743.htm>.

1159  
1160 72. Bijur, P.E., W. Silver, and E.J. Gallagher, *Reliability of the visual analog scale for measurement of*  
1161 *acute pain*. Acad Emerg Med, 2001. **8**(12): p. 1153-7.

1162 73. Kane, R.L., et al., *Visual Analog Scale pain reporting was standardized*. J Clin Epidemiol, 2005.  
1163 **58**(6): p. 618-23.

1164 74. Malviya, S., et al., *Depth of sedation in children undergoing computed tomography: validity and*  
1165 *reliability of the University of Michigan Sedation Scale (UMSS)*. Br J Anaesth, 2002. **88**(2): p. 241-  
1166 5.

1167 75. Chow SC, S.J., Wang H, *Sample Size Calculations in Clinical Research*. 2nd ed. 2003, New York:  
1168 Marcel Dekker.

1169 76. Julious, S.A., *Sample sizes for clinical trials with normal data*. Stat Med, 2004. **23**(12): p. 1921-86.

1170

1171

1172 **APPENDICES**

1173

1174 **APPENDIX A: Clinical Studies of Sub-dissociative (Intranasal and Intravenous) Dose Ketamine in Adults**

1175

| Study             | N  | Ages                  | Setting                         | Design                                                                                 | Doses                                                                           | Route | Outcome                                                                                                                                                                                            |
|-------------------|----|-----------------------|---------------------------------|----------------------------------------------------------------------------------------|---------------------------------------------------------------------------------|-------|----------------------------------------------------------------------------------------------------------------------------------------------------------------------------------------------------|
| Yeaman, 2014      | 72 | 26-52 years (IQR)     | Emergency Department, Australia | Prospective observational study: Ketamine, second dose if no improvement in 15 min     | 0.7-1 mg/kg, second dose (if necessary) 0.5 mg/kg, median total dose 0.98 mg/kg | IN    | 56% reported VAS reduction $\geq 20$ mm at 30 minutes                                                                                                                                              |
| Andolfatto, 2013  | 40 | 36-57 years (IQR)     | Emergency Department, Canada    | Prospective observational study: Ketamine                                              | 0.5-0.75 mg/kg                                                                  | IN    | 88% reported VAS reduction $\geq 13$ mm at 30 minutes                                                                                                                                              |
| Huge, 2010        | 16 | 54.5 $\pm$ 21.4 years | Outpatient, Germany             | Double blind randomized trial: (S)-Ketamine at 2 different doses                       | Group 1: 0.2 mg/kg<br>Group 2: 0.4 mg/kg                                        | IN    | Group 1: pain reduction to 70 $\pm$ 10% of initial pain at 60 minutes<br>Group 2: pain reduction to 61 $\pm$ 13% of initial pain at 60 minutes                                                     |
| Carr, 2004        | 20 | $\geq 18$ years       | Outpatient, USA                 | Randomized double blind crossover trial: Ketamine vs placebo                           | Ketamine 10-50 mg                                                               | IN    | Mean reduction in NPIS (10 point scale) score was 2.65 for ketamine vs 0.81 for placebo. IN ketamine is safe and effective for break through pain                                                  |
| Christensen, 2007 | 40 | $\geq 16$ years       | Postoperative USA               | Randomized double blind single dose parallel study: Ketamine #1 vs #2 vs #3 vs placebo | Ketamine 1 10 mg<br>Ketamine 2 30 mg<br>Ketamine 3 50 mg                        | IN    | IN Ketamine at 50 mg dose demonstrated statistically significant pain relief (VAS score) compared to placebo. Largest difference in mean VAS scores relative to placebo was 46.5 mm at 30 minutes. |

|                     |    |             |                                     |                                                                                                                        |                                                                                                                                                |    |                                                                                                                                                                                                                          |
|---------------------|----|-------------|-------------------------------------|------------------------------------------------------------------------------------------------------------------------|------------------------------------------------------------------------------------------------------------------------------------------------|----|--------------------------------------------------------------------------------------------------------------------------------------------------------------------------------------------------------------------------|
| Abdel-Ghaffar, 2012 | 60 | 18-65 years | Pre-operative<br>Egypt              | Randomized double blind placebo controlled trial:<br>Ketamine vs Fentanyl vs Saline                                    | Ketamine 1.5 mg/kg<br><br>Fentanyl 1.5 mcg/kg                                                                                                  | IN | Ketamine and fentanyl significantly prolonged time to first analgesic request. VAS scores were significantly lower with ketamine and fentanyl compared to saline in first 4h postop                                      |
| Afridi, 2013        | 18 | 18-57       | Inpatient and Outpatient,<br>London | Randomized double blind parallel controlled trial:<br>Ketamine vs Midazolam                                            | Ketamine 25 mg<br><br>Midazolam 2 mg                                                                                                           | IN | Ketamine reduced the severity but not the duration of aura, whereas midazolam as no effect                                                                                                                               |
| Riediger, 2015      | 22 | ≥18 years   | Postoperative<br>Switzerland        | Randomized double blind noninferiority trial:<br>S-Ketamine+Midazolam Vs Morphine                                      | S-ketamine 6 mg alternating with Midazolam 0.75 mg (lockout interval of 20 min between meds)<br><br>Morphine 2 mg (lockout interval of 12 min) | IN | Similar NRS scores in morphine and S-ketamine groups as 1, 2, 4, 24, 48 and 72 hours after surgery. No difference in bolus demands and deliveries of medications.                                                        |
| Messenger, 2008     | 63 | 14-65 years | Emergency Department,<br>Canada     | Randomized double blind controlled trial:<br>ketamine vs fentanyl (followed by propofol)                               | Ketamine 0.3 mg/kg<br><br>Fentanyl 1.5 mcg/kg                                                                                                  | IV | Ketamine and fentanyl have similar efficacy. Sub-dissociative ketamine is safer than fentanyl for ED procedural sedation and analgesia with propofol.                                                                    |
| Galinski, 2007      | 65 | 18-70 years | Emergency Department,<br>France     | Multicenter, randomized double blind trial:<br>Ketamine + morphine vs Normal saline + morphine                         | Ketamine 0.2 mg/kg<br><br>Morphine 0.1 mg/kg                                                                                                   | IV | Morphine consumption significantly lower in ketamine group than placebo (0.149 mg/kg vs 0.202 mg/kg). No significant difference in VAS score at 30 minutes                                                               |
| Gurnani, 1996       | 40 | Adult       | Emergency Department,<br>India      | Randomized double blind pilot trial:<br>Ketamine dose followed by infusion vs Morphine dose followed by q4 hour dosing | Ketamine 0.25 mg/kg initial dose, infusion at 0.1 mg/kg/hr<br><br>Morphine 0.1 mg/kg initial dose, 0.1 mg/kg q4                                | IV | VAS scores significantly lower in ketamine group. Patients in ketamine group significantly less drowsy. No ketamine patients required supplemental analgesia vs 90% of morphine patients required supplemental analgesia |
| Motov, 2015         | 90 | 18-55 years | Emergency                           | Randomized double                                                                                                      | Ketamine                                                                                                                                       | IV | Ketamine is as effective                                                                                                                                                                                                 |

|                 |     |             |                             |                                                                                                                    |                                                                      |                   |                                                                                                                                                                                                                                               |
|-----------------|-----|-------------|-----------------------------|--------------------------------------------------------------------------------------------------------------------|----------------------------------------------------------------------|-------------------|-----------------------------------------------------------------------------------------------------------------------------------------------------------------------------------------------------------------------------------------------|
|                 |     |             | Department, USA             | blind trial: Ketamine vs Morphine                                                                                  | 0.3 mg/kg<br>Morphine 0.1 mg/kg                                      |                   | as morphine for analgesia at 15 and 30 minutes (8.6 vs 8.5 at baseline, 3.2 vs 4.2 at 30 minutes)                                                                                                                                             |
| Miller, 2015    | 45  | 18-59 years | Emergency Department, USA   | Randomized controlled double blind superiority trial: Ketamine vs Morphine                                         | Ketamine 0.3 mg/kg<br>Morphine 0.1 mg/kg                             | IV                | Ketamine did not produce a greater reduction in NRS scores compared with morphine. Time to achieve maximum reduction in NRS was 5 min for ketamine and 100 min for morphine                                                                   |
| Tran, 2014      | 308 | >30 months  | Prehospital trauma, Vietnam | Prospective, cluster randomized study: Ketamine vs Morphine                                                        | Ketamine 0.2-0.3 mg/kg<br>Morphine 10 mg (adults)<br>5 mg (children) | IV<br>IM          | Ketamine provided an analgesic effect equal to that of morphine, no significant differences between the two groups.                                                                                                                           |
| Beaudoin, 2014  | 60  | 18-65 years | Emergency Department, USA   | Randomized controlled double blind trial:<br>Morphine/NS<br>Vs<br>Morphine/Ketamine 1<br>Vs<br>Morphine/Ketamine 2 | Morphine 0.5 mg/kg<br>Ketamine 1 0.15 mg/kg<br>Ketamine 2 0.3 mg/kg  | IV                | SPIDs (summed pain intensity difference) were higher for the ketamine groups. Patients in morphine group required rescue analgesia sooner than the ketamine groups. Patients with the higher ketamine dose sustained analgesic effect longer. |
| Lester, 2010    | 35  | 21-57 years | Emergency Department, USA   | Retrospective chart review: low dose ketamine as adjunct to opioids                                                | 0.1-0.6 mg/kg (5-35 mg)                                              | IV (30)<br>IM (5) | Improvement in pain in 54% of cases                                                                                                                                                                                                           |
| Johansson, 2009 | 27  | Adults      | Prehospital trauma, Sweden  | Prospective cohort study: Morphine vs Morphine+Ketamine                                                            | Morphine 0.2 mg/kg<br>Morphine (0.1 mg/kg) + Ketamine (0.2 mg/kg)    | IV                | Ketamine/morphine group had significant lower NRS scores than morphine alone (5.4±1.9 vs 3.1±1.4)                                                                                                                                             |
| Ahern, 2013     | 30  | 23-62 years | Emergency Department, USA   | Prospective observational study: Hydromorphone + Ketamine                                                          | Hydromorphone (0.5 mg)<br>Ketamine (15 mg)                           | IV                | Mean reduction in NRS score at 5 min was 6 and at 15 min was 5. SPID at 30 min was 25 and at 60 min was 41. (This protocol provided profound, rapid pain relief)                                                                              |
| Jennings, 2012  | 135 | ≥18 years   | Prehospital                 | Prospective,                                                                                                       | Morphine 5 mg                                                        | IV                | Morphine plus                                                                                                                                                                                                                                 |

|  |  |  |                      |                                                                                       |                                                                                                                               |  |                                                                                                                                                                           |
|--|--|--|----------------------|---------------------------------------------------------------------------------------|-------------------------------------------------------------------------------------------------------------------------------|--|---------------------------------------------------------------------------------------------------------------------------------------------------------------------------|
|  |  |  | trauma,<br>Australia | randomized controlled<br>multicenter study:<br>Morphine alone vs<br>Morphine+Ketamine | every 5 min until<br>pain free<br><br>Morphine 5 mg +<br>Ketamine 10 or 20<br>mg then 10 mg<br>every 3 min until<br>pain free |  | ketamine provides<br>analgesia superior to<br>that of morphine alone.<br>(mean NRS reduction of<br>5.6 vs 3.2). Ketamine<br>had a quicker reduction<br>of pain intensity. |
|--|--|--|----------------------|---------------------------------------------------------------------------------------|-------------------------------------------------------------------------------------------------------------------------------|--|---------------------------------------------------------------------------------------------------------------------------------------------------------------------------|

1176  
1177  
1178  
1179  
1180  
1181  
1182  
1183  
1184

**APPENDIX B: Clinical Studies of Sub-dissociative (Intranasal and Intravenous) and Dissociative (Intranasal) Dose Ketamine in Children**

| Study                                                                     | N  | Ages         | Setting                         | Design                                                          | Doses                                         | Route | Outcome                                                                                                                                                                                      |
|---------------------------------------------------------------------------|----|--------------|---------------------------------|-----------------------------------------------------------------|-----------------------------------------------|-------|----------------------------------------------------------------------------------------------------------------------------------------------------------------------------------------------|
| Graudins, 2015<br><br>Ketamine for analgesia (sub-dissociative low dose)  | 73 | 3-13 years   | Emergency Department, Australia | Double blind, randomized controlled trial: Fentanyl vs Ketamine | Fentanyl 1.5 mcg/kg<br><br>Ketamine 1 mg/kg   | IN    | Median reduction in VAS score at 30 minutes for ketamine was 45 mm and for fentanyl was 40 mm (no significant difference between groups), which was maintained to 60 minutes in both groups. |
| Yeaman, 2013<br><br>Ketamine for analgesia (sub-dissociative low dose)    | 28 | 3-13 years   | Emergency Department, Australia | Observational study: Ketamine                                   | Ketamine 0.8-1.48 mg/kg                       | IN    | IN ketamine provided adequate analgesia by 30 minutes. Median VAS decreased from 74.5 mm to 30 mm.                                                                                           |
| Johansson, 2013<br><br>Ketamine for analgesia (sub-dissociative low dose) | 9  | 7-36 years   | Prehospital trauma, Sweden      | Case series: (S)-Ketamine                                       | Ketamine 0.45 mg/kg-1.25 mg/kg                | IN    | IN S-ketamine provided adequate analgesia. Median pain score decreased from 10 to 3 (on a 10 point scale).                                                                                   |
| Nielsen, 2013<br><br>Ketamine for analgesia (sub-dissociative low dose)   | 50 | 0.8-17 years | Inpatient, Denmark              | Prospective nonrandomized trial: Sufentanil + Ketamine          | Sufentanil 0.5 mcg.kg PLUS Ketamine 0.5 mg/kg | IN    | Provided rapid analgesia in 78% of patients (decreased pain score to ≤5 on 10 pt scale).                                                                                                     |
| Tsze, 2012<br><br>Ketamine for sedation                                   | 12 | 1-7 years    | Emergency Department, USA       | Randomized, prospective double blind trial: Ketamine (3 doses)  | Ketamine #1 3 mg/kg<br>Ketamine #2 6 mg/kg    | IN    | Significantly higher proportion of successful sedations with 9 mg/kg dose than                                                                                                               |

|                                                                      |     |            |                                      |                                                                                      |                                                                                                             |    |                                                                                                                                                                                                                                                                    |
|----------------------------------------------------------------------|-----|------------|--------------------------------------|--------------------------------------------------------------------------------------|-------------------------------------------------------------------------------------------------------------|----|--------------------------------------------------------------------------------------------------------------------------------------------------------------------------------------------------------------------------------------------------------------------|
| (dissociative dosing)                                                |     |            |                                      |                                                                                      | Ketamine #3<br>9 mg/kg                                                                                      |    | the other two doses.                                                                                                                                                                                                                                               |
| Reid, 2011<br><br>Ketamine for analgesia (sub-dissociative low dose) | 1   | 9 years    | Prehospital, Australia               | Case Report: Ketamine                                                                | Ketamine<br>0.5 mg/kg                                                                                       | IN | Provided rapid resolution of pain and effective anxiolysis                                                                                                                                                                                                         |
| Roelofse, 2004<br><br>Ketamine for sedation (dissociative dosing)    | 50  | 5-7 years  | Operating room (Dental), New Zealand | Randomized double blind trial:<br>Sufentanil/Midazolam<br>Vs<br>Ketamine/Midazolam   | Sufentanil<br>20 mcg +<br>Midazolam<br>0.3 mg/kg<br><br>Ketamine<br>5 mg/kg +<br>Midazolam<br>0.3 mg/kg     | IN | No significant difference in sedation and anxiety levels pre-operatively or in postoperative recovery between the 2 groups. Sufentanil group experienced less pain but not statistically significant (P > 0.05).                                                   |
| Bahetwar, 2011<br><br>Ketamine for sedation (dissociative dosing)    | 45  | 2-6 years  | Outpatient Dental Clinic, India      | Triple blind randomized trial:<br>Midazolam vs<br>Ketamine vs<br>Midazolam+Ketamine  | Midazolam<br>0.3 mg/kg<br><br>Ketamine<br>6 mg/kg<br><br>Midazolam<br>0.2 mg/kg plus<br>Ketamine<br>4 mg/kg | IN | Ketamine alone had the fastest onset of sedation. Sedation success rate with ketamine was 89%, midazolam was 69% and combination group was 84%.                                                                                                                    |
| Khatavkar, 2014<br><br>Ketamine for sedation (dissociative dosing)   | 60  | 1-12 years | Pre-operative, India                 | Randomized single blind trial:<br>Midazolam vs<br>Midazolam+Ketamine                 | Midazolam<br>0.2 mg/kg<br><br>Midazolam<br>0.15 mg/kg +<br>Ketamine<br>1 mg/kg                              | IN | Sedation score, anxiolysis, reaction to IV insertion, face mask acceptance and emotional reaction were significantly better in Midazolam+Ketamine group                                                                                                            |
| Gyanesh, 2013<br><br>Ketamine for sedation (dissociative dosing)     | 150 | 1-10 years | Radiology (MRI), India               | Randomized double blind trial:<br>Dexmedetomidine vs<br>Ketamine vs<br>Normal saline | Dexmedetomidine<br>1 mcg/kg<br><br>Ketamine<br>5 mg/kg<br><br>Normal saline                                 | IN | Dexmedetomidine and ketamine were equally effective as premedication. In 90.4% of DXM patients and 82.7% of ketamine patients, anesthesiologists were satisfied with conditions for IV insertion. Total dose of propofol used was less in DXM and ketamine groups. |
| Buonsenso,                                                           | 36  | < 14 years | Inpatient,                           | Randomized double                                                                    | Midazolam                                                                                                   | IN | Significantly better                                                                                                                                                                                                                                               |

|               |     |                  |                               |                                                                                                                                |                                                                                                                                                                                                                  |    |                                                                                                                                                     |
|---------------|-----|------------------|-------------------------------|--------------------------------------------------------------------------------------------------------------------------------|------------------------------------------------------------------------------------------------------------------------------------------------------------------------------------------------------------------|----|-----------------------------------------------------------------------------------------------------------------------------------------------------|
| 2014          |     |                  | Italy                         | blind placebo controlled trial:<br>Midazolam+Ketamine<br>Vs<br>Normal saline                                                   | 0.5 mg/kg +<br>Ketamine 2 mg/kg                                                                                                                                                                                  |    | MOPS (Modified Objective Pain Score) reduction in treatment group. Mean MOPS in treatment group was 3.5 vs mean MOPS in placebo group was 7.2       |
| Kennedy, 1998 | 260 | 5-15 years       | Emergency Department, USA     | Randomized nonblinded trial:<br>Fentanyl+midazolam<br>vs<br>Ketamine+midazolam                                                 | Midazolam 0.5 mg/kg<br>Fentanyl 0.5 mcg/kg<br>Ketamine 0.5 mg/kg                                                                                                                                                 | IV | Patients receiving ketamine had significant reduction in mean OSBD-R scores compared to those receiving fentanyl during fracture reduction          |
| Elhakim, 2003 | 50  | 5-12 years       | Preoperative, Egypt           | Randomized double blind placebo controlled trial:<br>Ketamine + diclofenac + fentanyl<br>Vs<br>Placebo + diclofenac + fentanyl | Ketamine 0.1 mg/kg<br><br>Normal saline (same volume)<br><br>Diclofenac 2 mg/kg<br><br>Fentanyl 1 mcg/kg                                                                                                         | IM | Ketamine group had significantly lower pain scores at rest and on swallowing postoperatively. Ketamine group required less postoperative analgesia. |
| Finkel, 2007  | 11  | 3-17 years       | Inpatient, USA                | Retrospective review:<br>Ketamine infusion in addition to opioid analgesia                                                     | Ketamine 0.1-1 mg/kg/hr                                                                                                                                                                                          | IV | 73% of patients experienced significant decrease in opioid requirements after ketamine initiated                                                    |
| White, 2011   | 100 | 3-14 years       | Inpatient, United Kingdom     | Retrospective review:<br>Morphine PCA<br>Vs<br>Morphine+Ketamine PCA                                                           | Morphine PCA 1 mg/kg made up to 50 mL with saline<br><br>Morphine 1 mg/kg PLUS Ketamine 1 mg/kg PCA made up to 50 mL with saline<br><br>(bolus 20-40 mcg/kg, infusion 0-40 mcg/kg/hr, max 4h dose of 400 mcg/kg) | IV | Addition of ketamine to the morphine PCA is associated with reduced morphine consumption and improved pain scores.                                  |
| Taylor, 2014  | 14  | 1 month-23 years | Inpatient and Outpatient, USA | Retrospective case review:<br>Ketamine PCA in addition to prolonged                                                            | Ketamine 0.014-0.308 mg/kg/hr with demand dose of                                                                                                                                                                | IV | All patients with opioid refractory neuropathic pain had improved pain with the addition of                                                         |

|                                                                     |     |             |                                    |                                                                                                         |                                                                                                                               |       |                                                                                                                                                                                                                                                    |
|---------------------------------------------------------------------|-----|-------------|------------------------------------|---------------------------------------------------------------------------------------------------------|-------------------------------------------------------------------------------------------------------------------------------|-------|----------------------------------------------------------------------------------------------------------------------------------------------------------------------------------------------------------------------------------------------------|
| dissociative low dose)                                              |     |             |                                    | opioid use                                                                                              | 0.03/0.5 mg/kg every 10-60 min                                                                                                |       | ketamine to pain regimen                                                                                                                                                                                                                           |
| White, 2006<br>Ketamine for analgesia (sub-dissociative low dose)   | 3   | 12 years    | Inpatient, United Kingdom          | Case series of patients with toxic megacolon: Ketamine PCA                                              | Ketamine PCA 2 mg/kg made up to 50 mL with 5% dextrose (infusion 0-40 mcg/kg/hr, bolus 20-40 mcg/kg, lockout period 10-30 min | IV    | Improved pain scores in all patients. Safe and effective use of ketamine infusion                                                                                                                                                                  |
| White, 2007<br>Ketamine for analgesia (sub-dissociative low dose)   | 1   | 9 years     | Inpatient, Canada                  | Case report: Ketamine infusion in addition to Morphine infusion                                         | Morphine 40 mcg/kg/hr<br>Ketamine 80-200 mcg/kg/hr                                                                            | IV    | Long term ketamine infusion (37 days) provided safe and effective analgesia                                                                                                                                                                        |
| Dal, 2007<br>Ketamine for analgesia (sub-dissociative low dose)     | 90  | 2-12 years  | Perioperative, Turkey              | Randomized placebo controlled trial: Saline vs IV Ketamine bolus vs Peritonsillar ketamine infiltration | Saline 2 mL<br>Ketamine bolus 0.5 mg/kg<br>Ketamine infiltration 0.5 mg/kg                                                    | IV    | Ketamine groups had significant lower observational pain scores in hospital and at home than saline group. No significant difference in pain score between ketamine groups. Saline group had significantly shorter time to first rescue analgesia. |
| Bredmose, 2009<br>Ketamine for analgesia and sedation               | 164 | < 16 years  | Prehospital trauma, United Kingdom | Retrospective database review: Ketamine use (68% of these patients also received Midazolam)             | Ketamine 0.1-5.8 mg/kg (mean=1.0 mg/kg)<br>Midazolam 0.1-0.5 mg/kg (mean=0.1 mg/kg)                                           | IV/IM | Ketamine provided adequate analgesia and appropriate sedation without major side effects                                                                                                                                                           |
| Zempsky, 2010<br>Ketamine for analgesia (sub-dissociative low dose) | 5   | 12-18 years | Inpatient, USA                     | Case series of sickle cell disease patients: Ketamine infusion                                          | Ketamine 0.1-0.2 mg/kg/hr                                                                                                     | IV    | 2 of 5 patients achieved adequate pain control. 1 patient used significantly less opioids.                                                                                                                                                         |

1185  
1186  
1187  
1188  
1189  
1190  
1191  
1192  
1193



1194  
1195  
1196  
1197  
1198  
1199  
1200  
1201  
1202  
1203  
1204

**APPENDIX C: Study Flow Diagram**

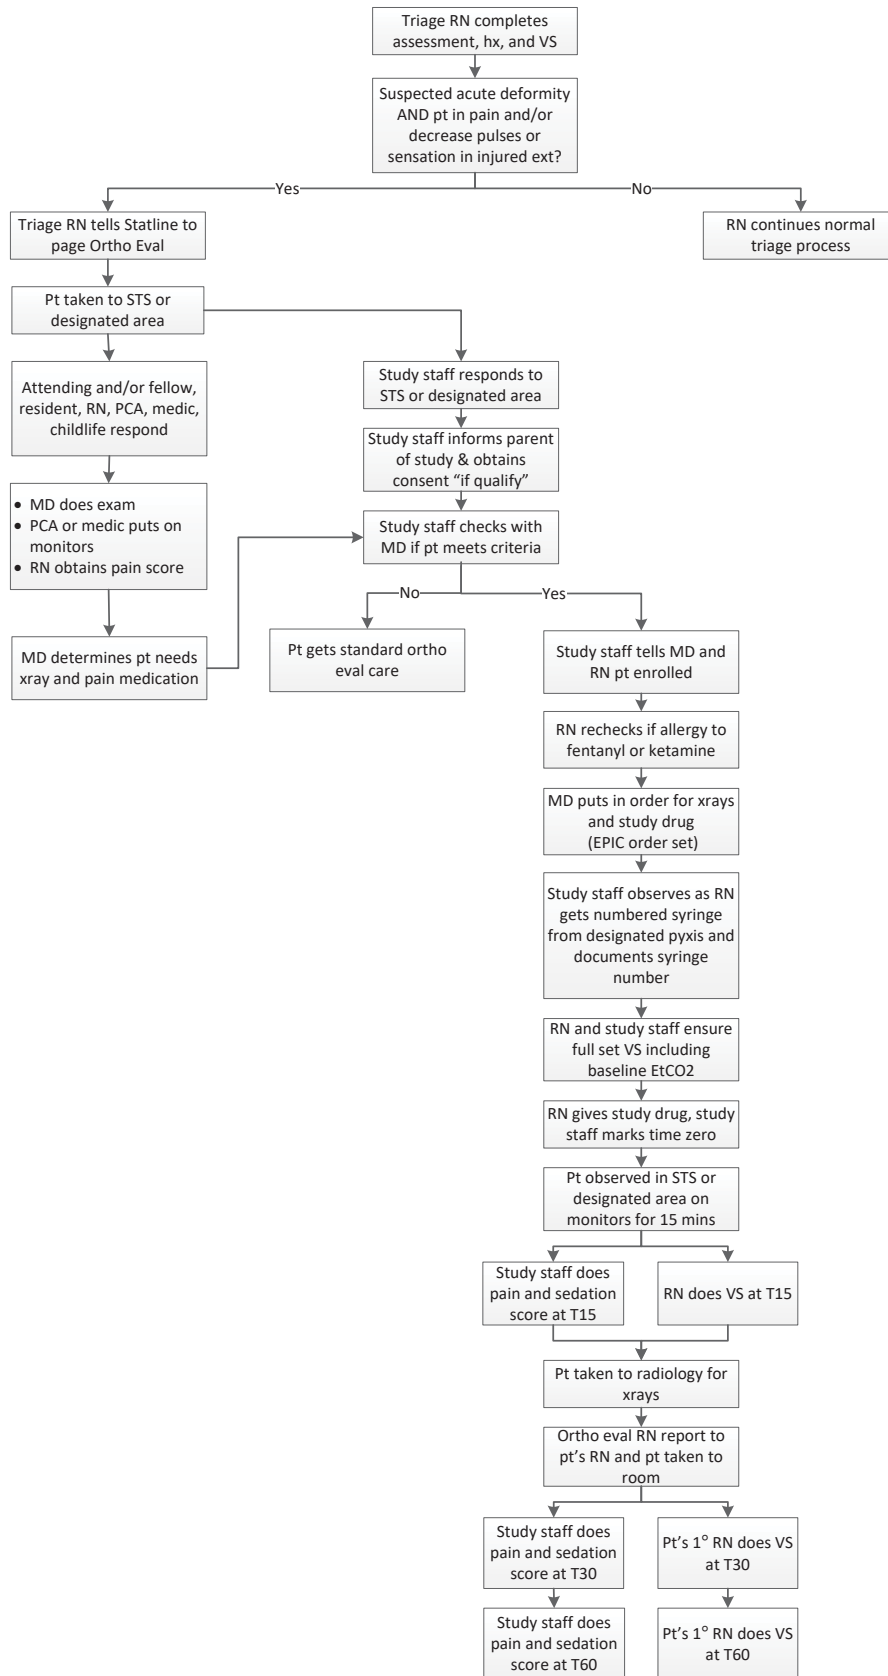

1205  
1206

**APPENDIX D: Current Orthopedic Evaluation Flow Diagram**

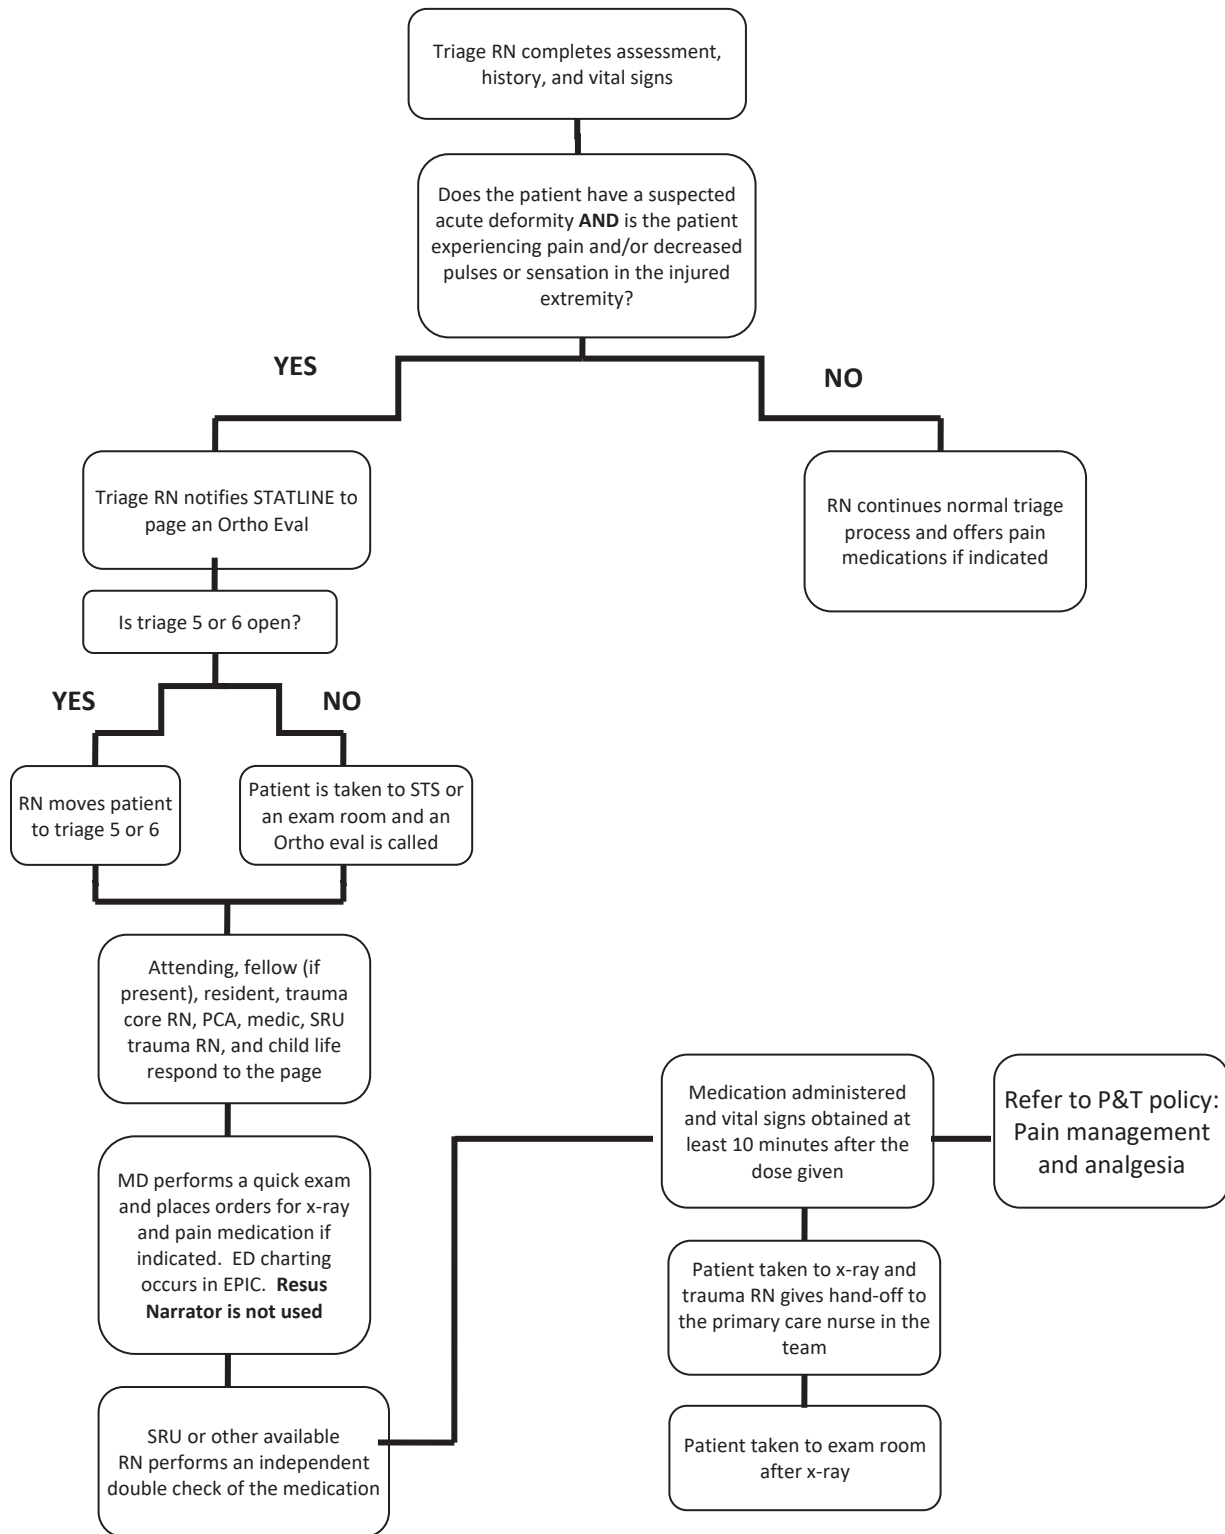

1212  
1213

### APPENDIX E: Study Procedures

| Study Procedure                                                                   | Who?                         | How much time?      |
|-----------------------------------------------------------------------------------|------------------------------|---------------------|
| Screening for eligibility                                                         | Research Study Staff         | 5 minutes           |
| Obtain baseline measurements (vital signs, EtCO <sub>2</sub> , weight, VAS, UMSS) | Nursing/Research study staff | 3 minutes           |
| Order, dispense and administer study medication                                   | Patient's physician/Nursing  | 5 minutes           |
| Obtain measurements at 15 minutes after medication                                | Nursing/Research study staff | 1 minute            |
| Obtain measurements at 30 minutes after medication                                | Nursing/Research study staff | 1 minute            |
| Obtain measurements at 60 minutes after medication                                | Nursing/Research study staff | 1 minute            |
| Document adverse events                                                           | Research study staff         | Throughout ED visit |
| Phone Follow up call                                                              | Research study staff         | 10 minutes          |

1214  
1215  
1216  
1217  
1218

### APPENDIX F: Drug Information and Package Inserts

1219

#### **Ketamine Human Pharmacokinetics**

1220  
1221  
1222  
1223  
1224

- Nielsen, et al in 2014 investigated a pediatric formulation of intranasal sufentanil 0.5 mcg/kg and ketamine 0.5 mg/kg for procedural pain and determined the bioavailability of ketamine was 35.8%. Maximum plasma concentration (C<sub>max</sub>) of ketamine was 0.102 mg/L (CV 10.8%) and T<sub>max</sub> was 8.5 min (CV 17.3%).

1225  
1226  
1227  
1228  
1229  
1230  
1231  
1232

- Malinovsky, et al in 1996 determined that after intranasal ketamine in children 10-30 kg, 2-9 years of age, mean plasma concentrations after 3 mg/kg peaked at 496 ng/mL at 20 minutes and after 9 mg/kg peaked at 2104 ng/mL within 21 minutes. Plasma concentrations of norketamine (the predominate metabolite), peaked at ~120 minutes after nasal ketamine. Calculated bioavailability from nasal administration was 0.5. The authors concluded that nasal administration of low doses of ketamine produced plasma concentrations associated with analgesia, but using high doses produced high plasma concentrations similar to those that induce anesthesia.

1233

#### **Dosing:**

1234

##### **Children:**

1235  
1236  
1237

- IM: 3 to 7 mg/kg
- IV: Range: 0.5 to 2 mg/kg, use smaller doses (0.5 to 1 mg/kg) for sedation for minor procedures; usual induction dosage: 1 to 2 mg/kg

1238

##### **Adults:**

1239  
1240  
1241

- IM: 3 to 8 mg/kg
- IV: Range: 1 to 4.5 mg/kg; usual induction dosage: 1 to 2 mg/kg

1242  
1243  
1244  
1245  
1246  
1247  
1248  
1249  
1250  
1251  
1252  
1253  
1254  
1255  
1256  
1257  
1258  
1259  
1260  
1261  
1262  
1263  
1264  
1265  
1266  
1267  
1268  
1269  
1270  
1271  
1272  
1273  
1274  
1275  
1276  
1277  
1278  
1279  
1280  
1281  
1282  
1283  
1284  
1285  
1286  
1287  
1288

**Fentanyl Human Pharmacokinetics**

- Onset of action: Analgesia: Intranasal: Children 3-12 years: 5-10 minutes (Borland, 2002)
- Half-life: Nasal spray: 15-25 hours (based on a multiple-dose pharmacokinetic study when doses are administered in the same nostril and separated by a 1-, 2-, or 4-hour time lapse)
- Time to peak serum concentration: Nasal spray: Median: 15-21 minutes

**Dosing:**

**Infants and Children:**

**Acute pain:** IV: Opioid-naive:

Infants: Limited data available: Initial: 1-2 mcg/kg/dose; may repeat at 2-4 hour intervals; in opioid-tolerant or younger infants, titration to higher doses may be required (up to 4 mcg/kg/dose) (Hegenbarth, 2008; Nelson, 1996; WHO, 2012)

Children: Limited data available in children <2 years: Initial: 1-2 mcg/kg/dose; may repeat at 30- to 60-minute intervals; in opioid-tolerant children, titration to higher doses may be required (Hegenbarth, 2008; Nelson, 1996; WHO, 2012)

**Analgesia for minor procedures/sedation:** Limited data available in children <2 years:

IM, IV: 1-2 mcg/kg/dose; administer 3 minutes before the procedure; maximum dose: 50 mcg; may repeat <sup>1</sup>/<sub>2</sub> original dose every 3-5 minutes if necessary; titrate to effect (Cramton, 2012; Krauss, 2006; Zeltzer, 1990)

Intranasal (using parenteral preparation): Limited data available: Infants and Children ≥10 kg: 1.5 mcg/kg once (maximum: 100 mcg/dose); reported range: 1-2 mcg/kg; some studies that used an initial dose of 1.5 mcg/kg allowed for additional incremental doses of 0.3-0.5 mcg/kg to be administered every 5 minutes, not to exceed a total dose of 3 mcg/kg depending on pain type and severity (Borland, 2002; Borland, 2005; Borland, 2007; Chung, 2010; Cole, 2009; Crellin, 2010; Herd, 2009; Manjushree, 2002; Saunders, 2010)

**Adolescents and Adults:**

**Analgesia for minor procedures/sedation:**

IV: 0.5-1 mcg/kg/dose; may repeat after 30-60 minutes; or 25-50 mcg, repeat full dose in 5 minutes if needed, may repeat 4-5 times with 25 mcg at 5-minute intervals if needed.

**Manufacturer Information**

Ketamine Hydrochloride Injection, USP, CII (50 mg/mL): Mylan Institutional LLC, Rockford, IL

Fentanyl Citrate Injection, USP, CII (50 mcg/mL): West-Ward Pharmaceuticals, Eatontown, New Jersey

LMA MAD Nasal Intranasal Mucosal Atomization Device: Wolfe-Tory Medical, Inc. Salt Lake City, Utah 84107

**Note: Please see Ketamine and Fentanyl package inserts for further information.**

1289

1290

**APPENDIX G: Normal Ranges for Study Vital Signs**

1291

**NORMAL VALUES (notify MD if outside range)**

1293 HEART RATE (per minute)

| Age        | Awake Rate |
|------------|------------|
| 8-10 years | 60 to 150  |
| > 10 years | 45 to 140  |

1294

1295 RESPIRATORY RATE (breaths/minute)

| Age        | Rate     |
|------------|----------|
| 8-10 years | 10 to 30 |
| > 10 years | 10 to 30 |

1296

1297 BLOOD PRESSURE

| Age         | Systolic Pressure (top) | Diastolic Pressure (bottom) |
|-------------|-------------------------|-----------------------------|
| 8-9 years   | 80-160                  | 40-80                       |
| 10-11 years | 80-160                  | 50-80                       |
| > 11 years  | 90-160                  | 50-80                       |

1298

1299 OXYGEN SATURATION should always be greater than 90 %

1300 END TIDAL should not decrease by more than 10 from baseline

1301 VAS should not increase by more than 15 from previous assessment

1302 UMSS should be 2 or less
