# Supplementary material
Source: PubMed Central journal article supplement (PMC6439599)
Supplement: jamapediatr-173-140-s003.pdf [file jamapediatr-173-140-s003.pdf]

## **Data Sharing Statement**

Frey. Effect of Intranasal Ketamine vs Fentanyl on Pain Reduction for Extremity Injuries in Children. *JAMA Pediatr*. Published December 28, 2018. 10.1001/jamapediatrics.2018.4582

### **Data**

**Data available:** No
